# Supplementary material
Source: PubMed Central journal article supplement (PMC6223259)
Supplement: NIHMS991477-supplement-SI.pdf [file NIHMS991477-supplement-SI.pdf]

# **The small molecule 2-Azido-2-deoxy-glucose is a metabolic chemical reporter of O-GlcNAc modifications in mammalian cells, revealing an unexpected promiscuity of O-GlcNAc transferase**

Balyn W. Zaro,<sup>a±</sup> Anna R. Batt,<sup>a\*±</sup> Kelly N. Chuh,<sup>a</sup> Marisol X. Navarro,<sup>a</sup> and Matthew R. Pratt<sup>a,b,\*</sup>

<sup>a</sup>Department of Chemistry, <sup>b</sup>Department of Molecular and Computational Biology  
University of Southern California, Los Angeles, CA 90089

\*Correspondence should be addressed to [matthew.pratt@usc.edu](mailto:matthew.pratt@usc.edu)

±These authors contributed equally

## **Table of Contents:**

|                                                                          |                |
|--------------------------------------------------------------------------|----------------|
| <b>Characterization of Ac<sub>4</sub>2AzGlc and Ac<sub>3</sub>2AzGlc</b> | <b>Page S2</b> |
| <b>Supplementary Table 1</b>                                             | <b>Page S7</b> |

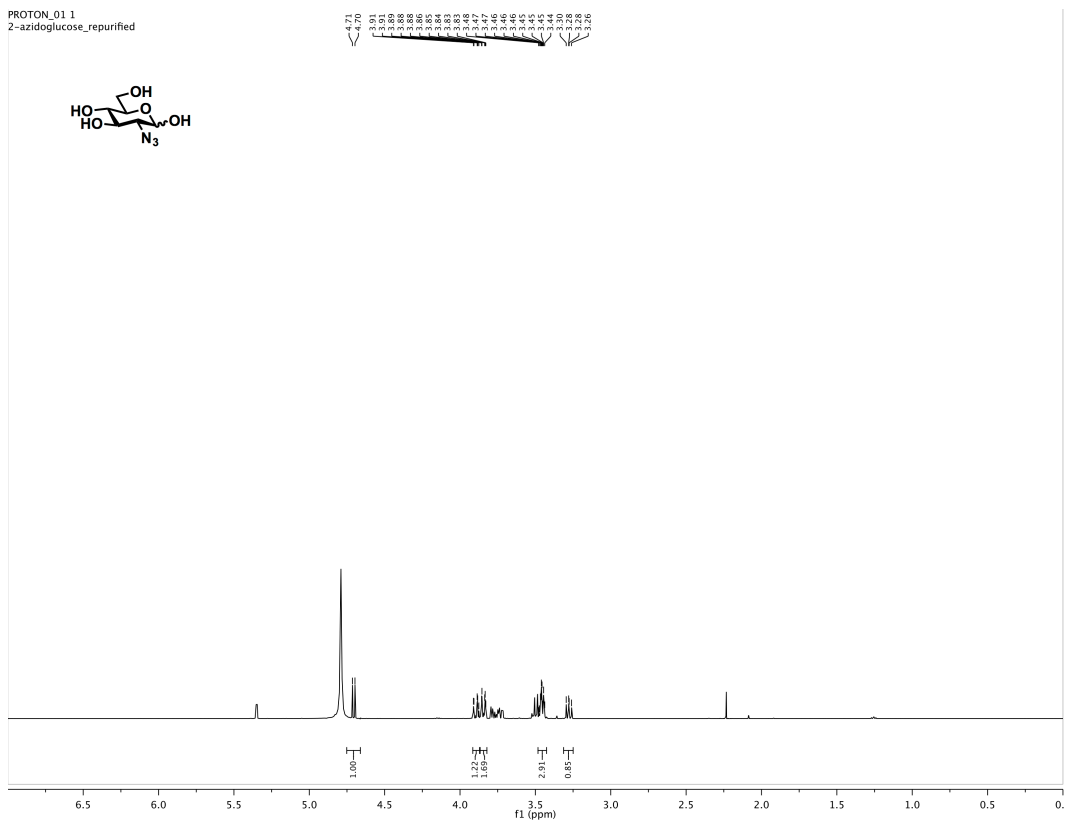

Supplementary Figure 1. 2-Azido-2-Deoxyglucose (1).

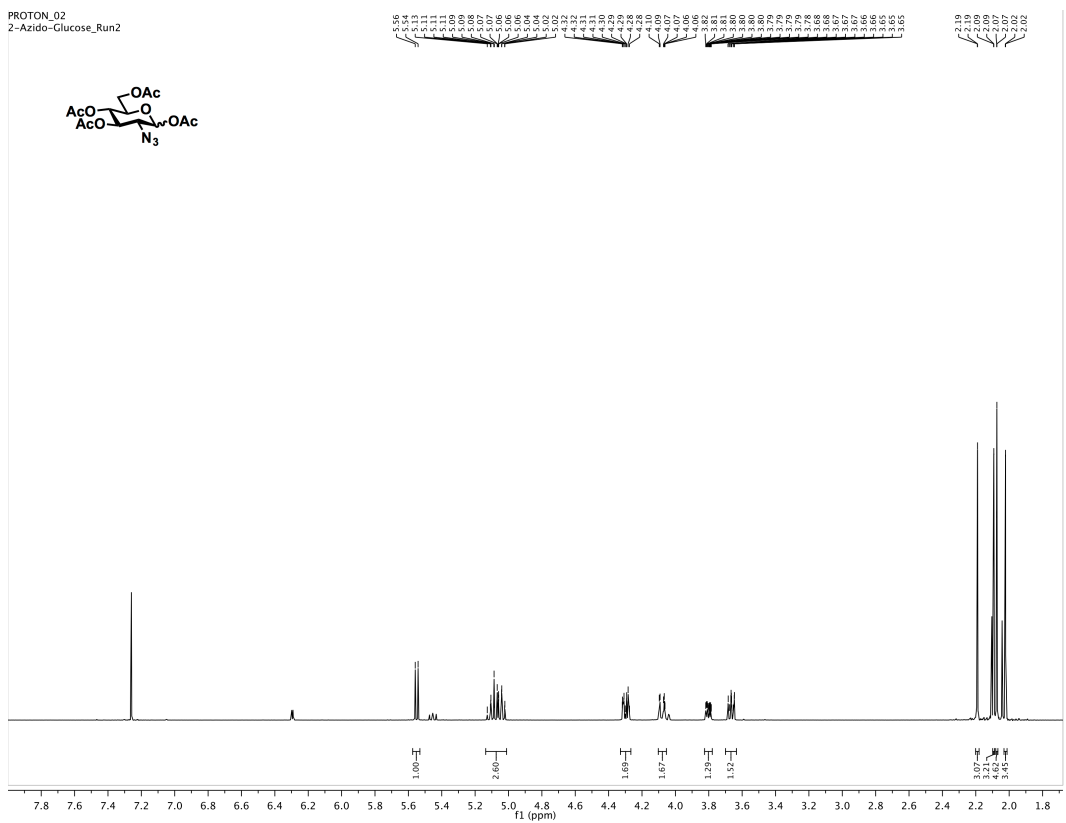

Supplementary Figure 2. 1,3,4,6-Tetra-O-Acetyl-2-Azido-2-Deoxyglucose (Ac<sub>4</sub>AzGlc, 2).

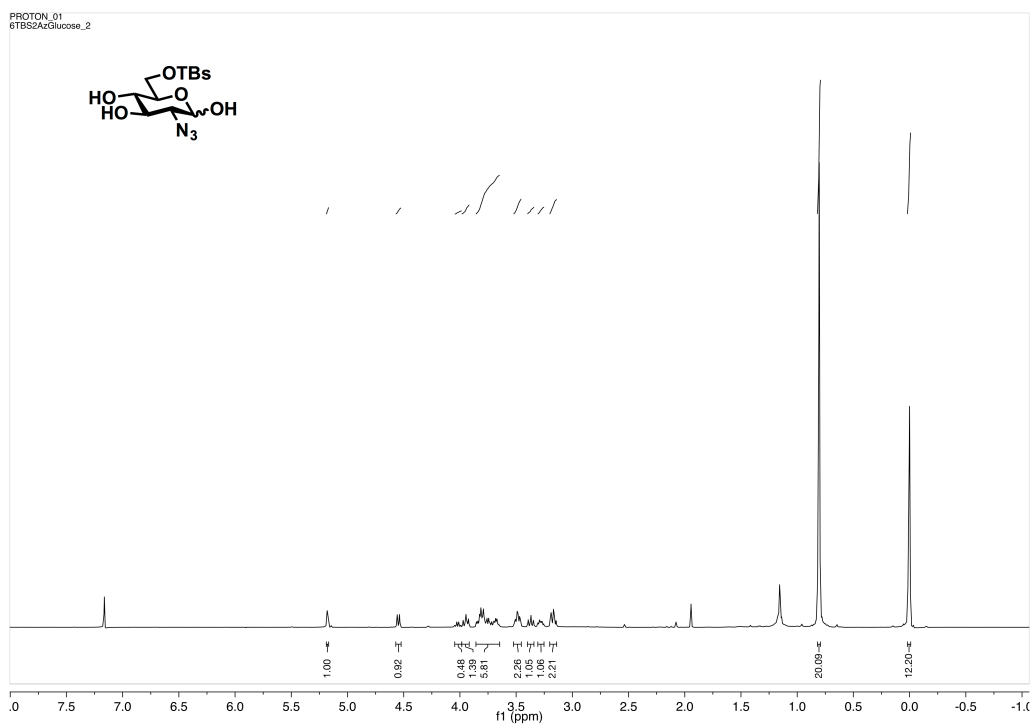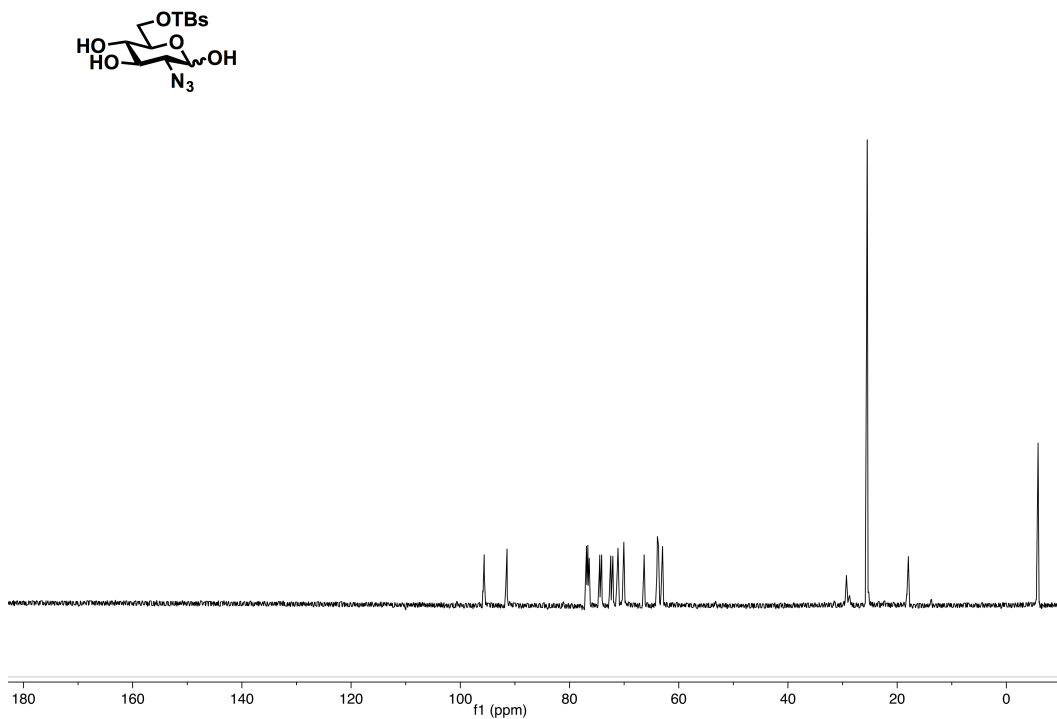

**Supplementary Figure 3.** 1,3,4-Tri-O-Acetyl-6-Tert-Butyldimethylsilyl-2-Azido-2-Deoxyglucose ( $Ac_3$ 6TBS2AzGlc, **3**).

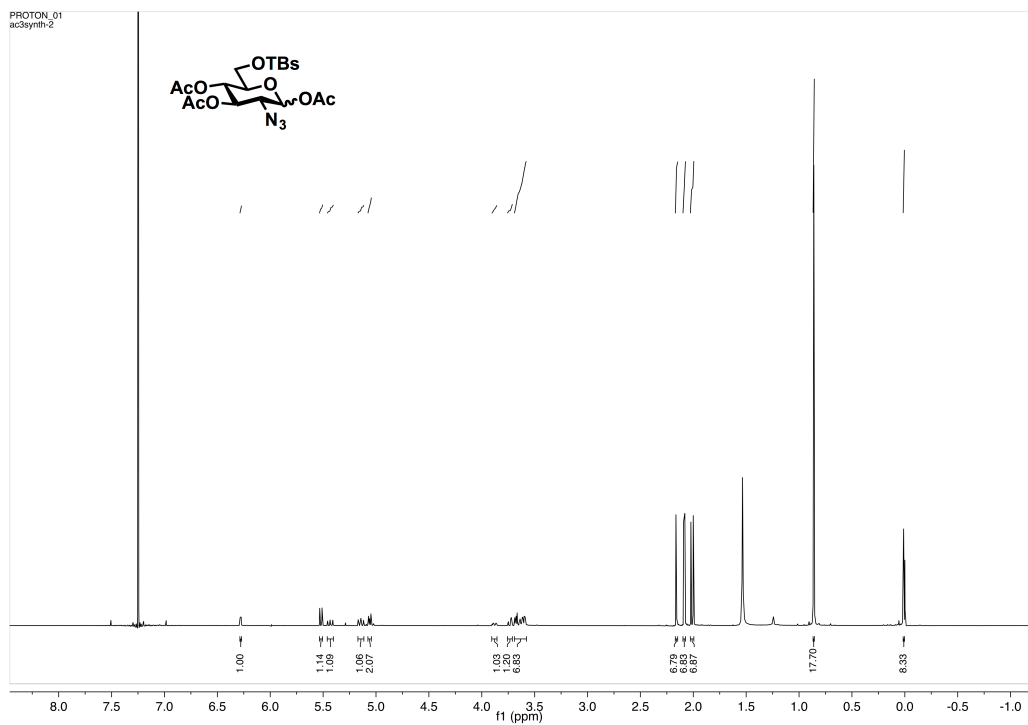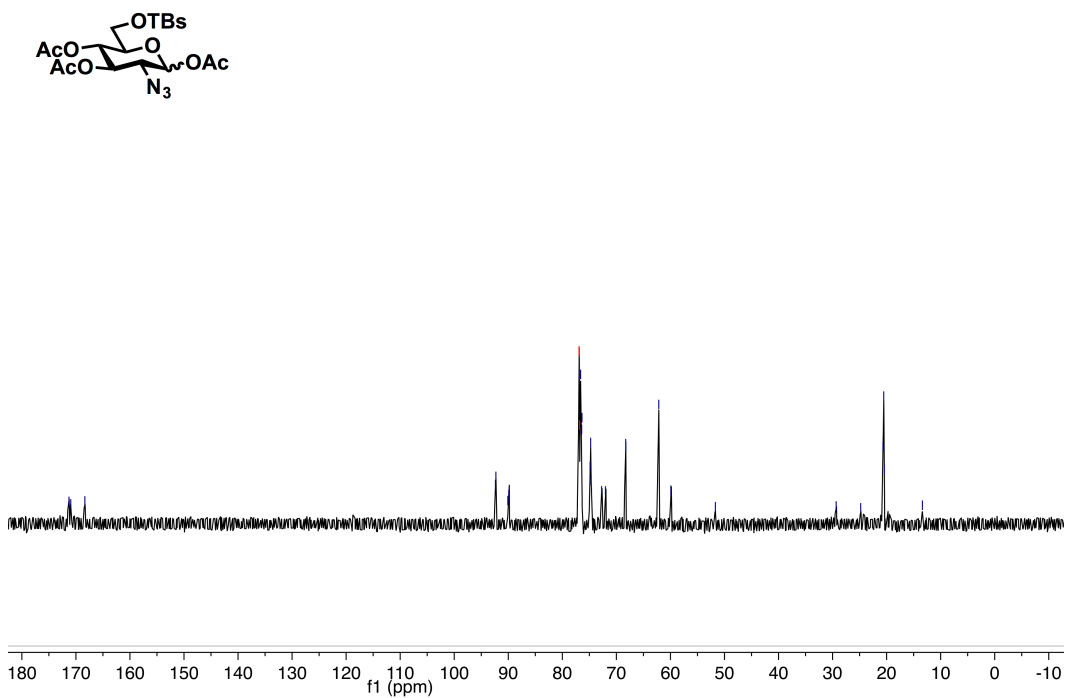

**Supplementary Figure 4.** 1,3,4-Tri-O-Acetyl-6-Tert-Butyldimethylsilyl-2-Azido-2-Deoxyglucose ( $\text{Ac}_3\text{6TBS2AzGlc}$ , **4**).

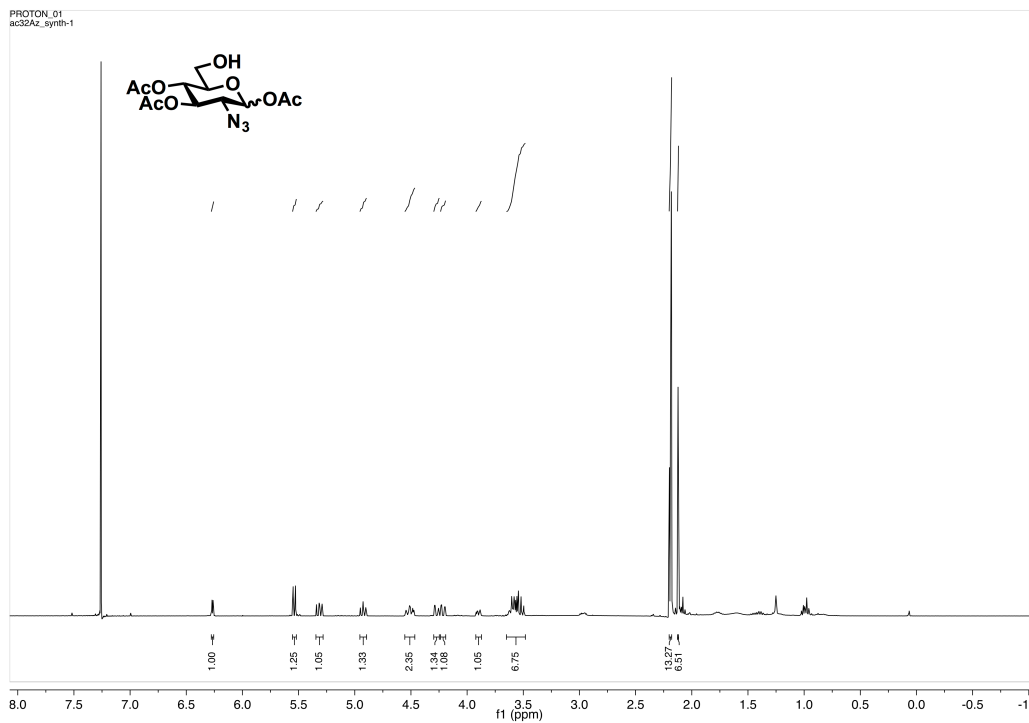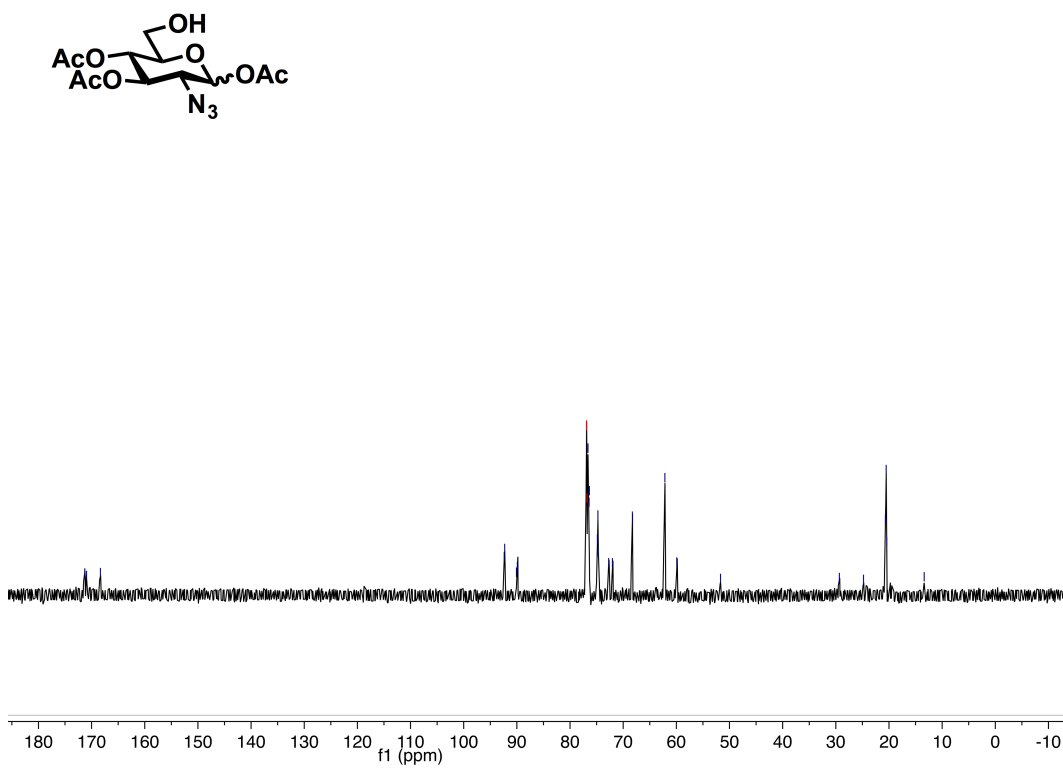

**Supplementary Figure 5.** 1,3,4-Tri-O-Acetyl-2-Azido-2-Deoxyglucose (Ac<sub>3</sub>2AzGlc, **5**).

PROTON\_01  
6OH2AzGlc\_DMSOH2O\_time0

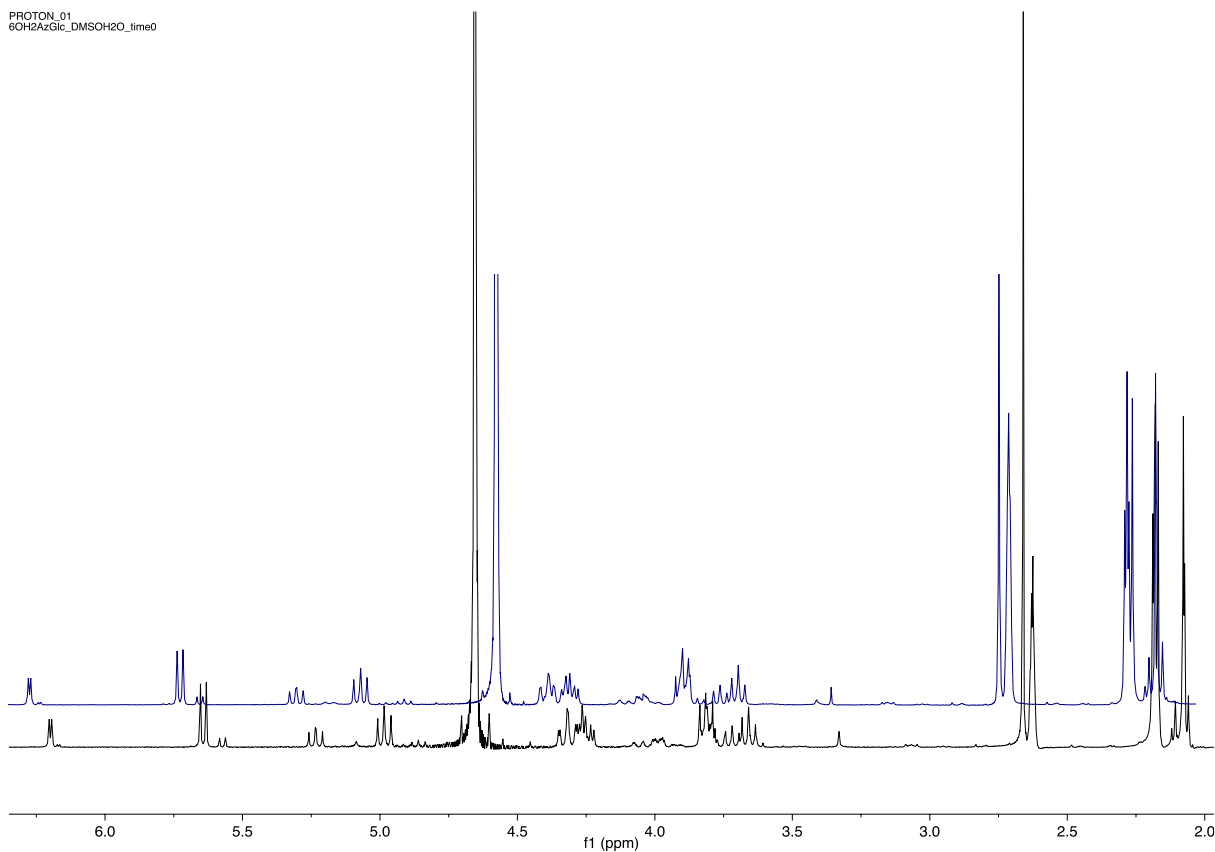

**Supplementary Figure 6. Aqueous conditions do not cause acetate migration in Ac<sub>3</sub>2AzGlc.** Ac<sub>3</sub>2AzGlc was dissolved in a 5:1 mixture of D<sub>2</sub>O and deuterated DMSO. An aliquot of this mixture was removed immediately (black spectra) and after incubation for 16 h (blue spectra). The aliquots were then diluted to a 1:1 mixture of D<sub>2</sub>O and deuterated DMSO before analysis by <sup>1</sup>H NMR.

**Supplementary Table 1.** Proteins identified using 2AzGlc enrichment. NIH 3T3 were treated in triplicate with either Ac<sub>4</sub>2AzGlc (200 μM, +) or Ac<sub>4</sub>GlcNAc (200 μM, -) for 6 hours. At this time the cell lysates were subjected to CuAAC with alkyne-biotin, followed by enrichment with streptavidin beads and on-bead trypsinolysis. Labeled proteins were selected as those that were represented by at least 1 unique-peptide in each Ac<sub>4</sub>2AzGlc treated sample, a total of at least 3 spectral-counts from the same three samples, and at least a total of 3 times more spectral counts in the Ac<sub>4</sub>2AzGlc treated samples compared to Ac<sub>4</sub>GlcNAc. Blue indicates proteins previously identified in the indicated O-GlcNAc proteomic studies.

| No. | Accession | Description                                                                                                                      | 2AzGlcNAc       |    |              |    |              |    | Enrichment Ratio | T-Test | MW [kDa] | Previously Identified |                                             |
|-----|-----------|----------------------------------------------------------------------------------------------------------------------------------|-----------------|----|--------------|----|--------------|----|------------------|--------|----------|-----------------------|---------------------------------------------|
|     |           |                                                                                                                                  | Spectral Counts |    |              |    |              |    |                  |        |          |                       |                                             |
|     |           |                                                                                                                                  | Experiment 1    |    | Experiment 2 |    | Experiment 3 |    |                  |        |          |                       | Sum                                         |
| -   | +         | -                                                                                                                                | +               | -  | +            | -  | +            | -  | +                |        |          |                       |                                             |
| 1   | Q9WTK5    | Nuclear factor NF-kappa-B p100 subunit OS=Mus musculus GN=Nfkb2 PE=1 SV=1 - [NFKB2_MOUSE]                                        | 0               | 18 | 0            | 18 | 0            | 15 | 0                | 51     | N/A      | 7.02E-05              | 96.8 (7)(16)(19)(20)                        |
| 2   | Q99K48    | Non-POU domain-containing octamer-binding protein OS=Mus musculus GN=Nono PE=1 SV=3 - [NONO_MOUSE]                               | 0               | 16 | 0            | 19 | 0            | 14 | 0                | 49     | N/A      | 3.57E-04              | 54.5 (7)(12)(16)(17)(19)(20)                |
| 3   | Q8BGD9    | Eukaryotic translation initiation factor 4B OS=Mus musculus GN=Eif4b PE=1 SV=1 - [IF4B_MOUSE]                                    | 0               | 12 | 0            | 14 | 0            | 14 | 0                | 40     | N/A      | 3.69E-05              | 68.8 (19)(20)                               |
| 4   | Q99PG2    | Opioid growth factor receptor OS=Mus musculus GN=Ogfr PE=2 SV=1 - [OGFR_MOUSE]                                                   | 0               | 11 | 0            | 11 | 0            | 16 | 0                | 38     | N/A      | 1.61E-03              | 70.6 (7)(20)                                |
| 5   | Q9Z1F9    | SUMO-activating enzyme subunit 2 OS=Mus musculus GN=Uba2 PE=2 SV=1 - [SAE2_MOUSE]                                                | 0               | 17 | 0            | 6  | 0            | 13 | 0                | 36     | N/A      | 2.02E-02              | 70.5 (19)(20)                               |
| 6   | Q60865    | Caprin-1 OS=Mus musculus GN=Caprin1 PE=1 SV=2 - [CAPR1_MOUSE]                                                                    | 0               | 12 | 0            | 11 | 0            | 10 | 0                | 33     | N/A      | 4.47E-05              | 78.1 (12)(16)(19)(20)                       |
| 7   | Q8CI11    | Guanine nucleotide-binding protein-like 3 OS=Mus musculus GN=Gnl3 PE=1 SV=2 - [GNL3_MOUSE]                                       | 0               | 8  | 0            | 12 | 0            | 11 | 0                | 31     | N/A      | 1.01E-03              | 60.7 (7)(16)(19)(20)                        |
| 8   | P97372    | Proteasome activator complex subunit 2 OS=Mus musculus GN=Psm2 PE=2 SV=4 - [PSME2_MOUSE]                                         | 0               | 10 | 0            | 11 | 0            | 9  | 0                | 30     | N/A      | 6.52E-05              | 27 (7)(10)(18)(19)                          |
| 9   | Q61584-4  | Isoform C of Fragile X mental retardation syndrome-related protein 1 OS=Mus musculus GN=Fxr1 - [FXR1_MOUSE]                      | 0               | 10 | 0            | 11 | 0            | 8  | 0                | 29     | N/A      | 3.94E-04              | 72.8 (7)(20)                                |
| 10  | B1AU76    | Nuclear autoantigenic sperm protein OS=Mus musculus GN=Nasp PE=4 SV=1 - [B1AU76_MOUSE]                                           | 0               | 11 | 0            | 9  | 0            | 6  | 0                | 26     | N/A      | 3.97E-03              | 48.7 (19)                                   |
| 11  | Q62418-3  | Isoform 3 of Drebrin-like protein OS=Mus musculus GN=Dbnl - [DBNL_MOUSE]                                                         | 0               | 7  | 0            | 9  | 0            | 10 | 0                | 26     | N/A      | 6.01E-04              | 48.3 (7)(13)(16)(19)(20)                    |
| 12  | Q60710    | SAM domain and HD domain-containing protein 1 OS=Mus musculus GN=Samhd1 PE=1 SV=2 - [SAMH1_MOUSE]                                | 0               | 11 | 0            | 6  | 0            | 8  | 0                | 25     | N/A      | 4.58E-03              | 72.6 (16)(20)                               |
| 13  | Q64012-2  | Isoform 1 of RNA-binding protein Raly OS=Mus musculus GN=Raly - [RALY_MOUSE]                                                     | 0               | 7  | 0            | 10 | 0            | 8  | 0                | 25     | N/A      | 7.00E-04              | 31.2 (20)                                   |
| 14  | Q91W50    | Cold shock domain-containing protein E1 OS=Mus musculus GN=Csde1 PE=2 SV=1 - [CSDE1_MOUSE]                                       | 0               | 7  | 0            | 8  | 0            | 10 | 0                | 25     | N/A      | 7.00E-04              | 88.7 (7)(12)(20)                            |
| 15  | Q61191    | Host cell factor 1 OS=Mus musculus GN=Hcfc1 PE=1 SV=2 - [HCFC1_MOUSE]                                                            | 0               | 9  | 0            | 7  | 0            | 8  | 0                | 24     | N/A      | 1.57E-04              | 210.3 (1)(2)(7)(12)(13)(14)(17)(18)(19)(20) |
| 16  | Q3UZ39    | Leucine-rich repeat flightless-interacting protein 1 OS=Mus musculus GN=Lrrf1 PE=1 SV=2 - [LRRF1_MOUSE]                          | 0               | 9  | 0            | 7  | 0            | 8  | 0                | 24     | N/A      | 1.57E-04              | 79.2 (16)(19)(20)                           |
| 17  | Q9QX56-3  | Isoform E2 of Drebrin OS=Mus musculus GN=Dbn1 - [DREB_MOUSE]                                                                     | 0               | 9  | 0            | 8  | 0            | 7  | 0                | 24     | N/A      | 1.57E-04              | 72.4 (16)(20)                               |
| 18  | O88291    | DBIRD complex subunit ZNF326 OS=Mus musculus GN=Znf326 PE=1 SV=1 - [ZNF326_MOUSE]                                                | 0               | 10 | 0            | 6  | 0            | 8  | 0                | 24     | N/A      | 2.28E-03              | 65.2 (16)(20)                               |
| 19  | Q8R5H1-5  | Isoform 5 of Ubiquitin carboxyl-terminal hydrolase 15 OS=Mus musculus GN=Usp15 - [UBP15_MOUSE]                                   | 0               | 10 | 0            | 9  | 0            | 5  | 0                | 24     | N/A      | 6.35E-03              | 109.2 (16)(20)                              |
| 20  | P58871    | 182 kDa tankyrase-1-binding protein OS=Mus musculus GN=Tnks1bp1 PE=1 SV=2 - [TB182_MOUSE]                                        | 0               | 6  | 0            | 9  | 0            | 8  | 0                | 23     | N/A      | 9.64E-04              | 181.7 (1)(13)(16)(19)(20)                   |
| 21  | Q9CT10    | Ran-binding protein 3 OS=Mus musculus GN=Ranbp3 PE=1 SV=2 - [RANB3_MOUSE]                                                        | 0               | 5  | 0            | 8  | 0            | 10 | 0                | 23     | N/A      | 6.18E-03              | 52.5 (20)                                   |
| 22  | Q6PAM1    | Alpha-taxilin OS=Mus musculus GN=Txlha PE=2 SV=1 - [TXLNA_MOUSE]                                                                 | 0               | 7  | 0            | 8  | 0            | 8  | 0                | 23     | N/A      | 2.12E-05              | 62.3 (7)(16)(19)(20)                        |
| 23  | P42227-2  | Isoform Stat3B of Signal transducer and activator of transcription 3 OS=Mus musculus GN=Stat3 - [STAT3_MOUSE]                    | 0               | 8  | 0            | 7  | 0            | 7  | 0                | 22     | N/A      | 2.53E-05              | 83.1 (1)(7)(13)(20)                         |
| 24  | P68037    | Ubiquitin-conjugating enzyme E2 L3 OS=Mus musculus GN=Ube2l3 PE=2 SV=1 - [UB2L3_MOUSE]                                           | 0               | 7  | 0            | 11 | 0            | 4  | 0                | 22     | N/A      | 2.24E-02              | 17.9 (19)(20)                               |
| 25  | Q9JLV1    | BAG family molecular chaperone regulator 3 OS=Mus musculus GN=Bag3 PE=1 SV=2 - [BAG3_MOUSE]                                      | 0               | 6  | 0            | 8  | 0            | 8  | 0                | 22     | N/A      | 3.88E-04              | 61.8 (7)(16)(19)(20)                        |
| 26  | O70310    | Glycylpeptide N-tetradecanoyltransferase 1 OS=Mus musculus GN=Nmt1 PE=1 SV=1 - [NMT1_MOUSE]                                      | 0               | 8  | 0            | 5  | 0            | 9  | 0                | 22     | N/A      | 3.65E-03              | 56.9 (7)(20)                                |
| 27  | P49586    | Choline-phosphate cytidyltransferase A OS=Mus musculus GN=Pcyt1a PE=1 SV=1 - [PCY1A_MOUSE]                                       | 0               | 9  | 0            | 7  | 0            | 5  | 0                | 21     | N/A      | 3.74E-03              | 41.6 (16)(20)                               |
| 28  | P48774    | Glutathione S-transferase Mu 5 OS=Mus musculus GN=Gstm5 PE=1 SV=1 - [GSTM5_MOUSE]                                                | 0               | 5  | 0            | 9  | 0            | 7  | 0                | 21     | N/A      | 3.74E-03              | 26.6 (19)                                   |
| 29  | O08915    | AH receptor-interacting protein OS=Mus musculus GN=Aip PE=1 SV=1 - [AIP_MOUSE]                                                   | 0               | 6  | 0            | 8  | 0            | 6  | 0                | 20     | N/A      | 5.62E-04              | 37.6 (13)(20)                               |
| 30  | Q9CXW3    | Calcyclin-binding protein OS=Mus musculus GN=Cacybp PE=1 SV=1 - [CYBP_MOUSE]                                                     | 0               | 7  | 0            | 6  | 0            | 7  | 0                | 20     | N/A      | 3.69E-05              | 26.5 (19)(20)                               |
| 31  | Q8C7R4    | Ubiquitin-like modifier-activating enzyme 6 OS=Mus musculus GN=Uba6 PE=1 SV=1 - [UBA6_MOUSE]                                     | 0               | 7  | 0            | 4  | 0            | 9  | 0                | 20     | N/A      | 1.01E-02              | 117.9 (7)(16)(20)                           |
| 32  | Q8BK64    | Activator of 90 kDa heat shock protein ATPase homolog 1 OS=Mus musculus GN=Ahsa1 PE=2 SV=2 - [AHS1_MOUSE]                        | 0               | 8  | 0            | 6  | 0            | 6  | 0                | 20     | N/A      | 5.62E-04              | 38.1 (7)(16)(20)                            |
| 33  | P51859    | Hepatoma-derived growth factor OS=Mus musculus GN=Hdgf PE=1 SV=2 - [HDGF_MOUSE]                                                  | 0               | 6  | 0            | 7  | 0            | 7  | 0                | 20     | N/A      | 3.69E-05              | 26.3 (7)(19)(20)                            |
| 34  | Q8R1X6    | Spartin OS=Mus musculus GN=Spg20 PE=2 SV=1 - [SPG20_MOUSE]                                                                       | 0               | 3  | 0            | 6  | 0            | 10 | 0                | 19     | N/A      | 3.54E-02              | 72.6 (1)(13)(20)                            |
| 35  | P52479    | Ubiquitin carboxyl-terminal hydrolase 10 OS=Mus musculus GN=Usp10 PE=1 SV=3 - [UBP10_MOUSE]                                      | 0               | 5  | 0            | 8  | 0            | 6  | 0                | 19     | N/A      | 1.99E-03              | 87 (16)(19)(20)                             |
| 36  | Q9DBC7    | cAMP-dependent protein kinase type I-alpha regulatory subunit OS=Mus musculus GN=Prkar1a PE=1 SV=3 - [KAP0_MOUSE]                | 0               | 7  | 0            | 5  | 0            | 7  | 0                | 19     | N/A      | 6.85E-04              | 43.2 (20)                                   |
| 37  | Q05CL8    | La-related protein 7 OS=Mus musculus GN=Larp7 PE=1 SV=2 - [LARP7_MOUSE]                                                          | 0               | 5  | 0            | 7  | 0            | 7  | 0                | 19     | N/A      | 6.85E-04              | 64.8 (7)(16)(20)                            |
| 38  | Q8K183    | Pyridoxal kinase OS=Mus musculus GN=Pdxk PE=1 SV=1 - [PDXK_MOUSE]                                                                | 0               | 7  | 0            | 6  | 0            | 5  | 0                | 18     | N/A      | 4.84E-04              | 35 (10)                                     |
| 39  | Q60749    | KH domain-containing, RNA-binding, signal transduction-associated protein 1 OS=Mus musculus GN=Khdrbs1 PE=1 SV=2 - [KHDR1_MOUSE] | 0               | 6  | 0            | 6  | 0            | 6  | 0                | 18     | N/A      | 0.00E+00              | 48.3 (10)(19)(20)                           |
| 40  | Q91VM9    | Inorganic pyrophosphatase 2, mitochondrial OS=Mus musculus GN=Ppa2 PE=2 SV=1 - [IPYR2_MOUSE]                                     | 0               | 6  | 0            | 6  | 0            | 6  | 0                | 18     | N/A      | 0.00E+00              | 38.1 (16)                                   |
| 41  | Q99P88    | Nuclear pore complex protein Nup155 OS=Mus musculus GN=Nup155 PE=2 SV=1 - [NU155_MOUSE]                                          | 0               | 7  | 0            | 4  | 0            | 7  | 0                | 18     | N/A      | 3.88E-03              | 155 (16)                                    |
| 42  | Q9D4G5    | Protein Pop1 OS=Mus musculus GN=Pop1 PE=2 SV=1 - [Q9D4G5_MOUSE]                                                                  | 0               | 7  | 0            | 5  | 0            | 6  | 0                | 18     | N/A      | 4.84E-04              | 114 (20)                                    |

|               |             | 2AzGlcNAc                                                                                                                            |   |                  |   |                  |   |     |   |                     |        |             |                         |  |
|---------------|-------------|--------------------------------------------------------------------------------------------------------------------------------------|---|------------------|---|------------------|---|-----|---|---------------------|--------|-------------|-------------------------|--|
|               |             | Spectral Counts                                                                                                                      |   |                  |   |                  |   |     |   |                     |        |             |                         |  |
|               |             | Experimen<br>t 1                                                                                                                     |   | Experime<br>nt 2 |   | Experime<br>nt 3 |   | Sum |   |                     |        |             |                         |  |
| Accessio<br>n | Description | -                                                                                                                                    | + | -                | + | -                | + | -   | + | Enrichment<br>Ratio | T-Test | MW<br>[kDa] | Previously Identified   |  |
| 43            | Q91Z38      | Tetratricopeptide repeat protein 1 OS=Mus musculus GN=Ttc1 PE=2 SV=1 - [TTC1_MOUSE]                                                  | 0 | 7                | 0 | 7                | 0 | 4   | 0 | 18                  | N/A    | 3.88E-03    | 33.2 (7)(16)(20)        |  |
| 44            | Q91X76      | 5'-nucleotidase domain containing 2 OS=Mus musculus GN=Nt5dc2 PE=2 SV=1 - [Q91X76_MOUSE]                                             | 0 | 3                | 0 | 7                | 0 | 8   | 0 | 18                  | N/A    | 1.71E-02    | 46                      |  |
| 45            | P35550      | rRNA 2'-O-methyltransferase fibrillar OS=Mus musculus GN=Fbl PE=1 SV=2 - [FBRL_MOUSE]                                                | 0 | 5                | 0 | 5                | 0 | 7   | 0 | 17                  | N/A    | 1.05E-03    | 34.3 (20)               |  |
| 46            | A2A5R8      | Double-stranded RNA-binding protein Staufen homolog 1 OS=Mus musculus GN=Stau1 PE=4 SV=1 - [A2A5R8_MOUSE]                            | 0 | 7                | 0 | 5                | 0 | 5   | 0 | 17                  | N/A    | 1.05E-03    | 53.7 (20)               |  |
| 47            | Q62433      | Protein NDRG1 OS=Mus musculus GN=Ndr1 PE=1 SV=1 - [NDRG1_MOUSE]                                                                      | 0 | 6                | 0 | 6                | 0 | 5   | 0 | 17                  | N/A    | 7.02E-05    | 43 (7)(20)              |  |
| 48            | P35235      | Tyrosine-protein phosphatase non-receptor type 11 OS=Mus musculus GN=Ptpn11 PE=1 SV=2 - [PTN11_MOUSE]                                | 0 | 5                | 0 | 5                | 0 | 6   | 0 | 16                  | N/A    | 8.92E-05    | 68.4 (10)(16)(20)       |  |
| 49            | Q99LD8      | N(G),N(G)-dimethylarginine dimethylaminohydrolase 2 OS=Mus musculus GN=Ddah2 PE=1 SV=1 - [DDAH2_MOUSE]                               | 0 | 7                | 0 | 3                | 0 | 6   | 0 | 16                  | N/A    | 1.14E-02    | 29.6 (13)               |  |
| 50            | B9EIF6      | Zinc finger protein 36, C3H type-like 2 OS=Mus musculus GN=Zfp36l2 PE=2 SV=1 - [B9EIF6_MOUSE]                                        | 0 | 4                | 0 | 6                | 0 | 6   | 0 | 16                  | N/A    | 1.32E-03    | 50 (16)                 |  |
| 51            | P30416      | Peptidyl-prolyl cis-trans isomerase FKBP4 OS=Mus musculus GN=Fkbp4 PE=1 SV=5 - [FKBP4_MOUSE]                                         | 0 | 6                | 0 | 5                | 0 | 5   | 0 | 16                  | N/A    | 8.92E-05    | 51.5 (4)(7)(19)(20)     |  |
| 52            | Q9D5T0      | ATPase family AAA domain-containing protein 1 OS=Mus musculus GN=Atad1 PE=1 SV=1 - [ATAD1_MOUSE]                                     | 0 | 5                | 0 | 6                | 0 | 5   | 0 | 16                  | N/A    | 8.92E-05    | 40.7 (7)(16)(20)        |  |
| 53            | Q8C878      | NEDD8-activating enzyme E1 catalytic subunit OS=Mus musculus GN=Uba3 PE=1 SV=2 - [UBA3_MOUSE]                                        | 0 | 5                | 0 | 4                | 0 | 7   | 0 | 16                  | N/A    | 3.77E-03    | 51.7                    |  |
| 54            | Q9CWEO      | Protein FAM54B OS=Mus musculus GN=Fam54b PE=1 SV=1 - [FA54B_MOUSE]                                                                   | 0 | 6                | 0 | 4                | 0 | 5   | 0 | 15                  | N/A    | 9.78E-04    | 31.7 (20)               |  |
| 55            | Q62426      | Cystatin-B OS=Mus musculus GN=Cstb PE=1 SV=1 - [CYTB_MOUSE]                                                                          | 0 | 6                | 0 | 6                | 0 | 3   | 0 | 15                  | N/A    | 7.49E-03    | 11 (20)                 |  |
| 56            | P61759      | Prefoldin subunit 3 OS=Mus musculus GN=Vbp1 PE=2 SV=2 - [PFD3_MOUSE]                                                                 | 0 | 5                | 0 | 5                | 0 | 5   | 0 | 15                  | N/A    | 0.00E+00    | 22.4 (20)               |  |
| 57            | Q9ES74      | Serine/threonine-protein kinase Nek7 OS=Mus musculus GN=Nek7 PE=2 SV=1 - [NEK7_MOUSE]                                                | 0 | 4                | 0 | 7                | 0 | 4   | 0 | 15                  | N/A    | 7.49E-03    | 34.5 (7)                |  |
| 58            | Q8C052      | Microtubule-associated protein 1S OS=Mus musculus GN=Map1s PE=1 SV=2 - [MAP1S_MOUSE]                                                 | 0 | 5                | 0 | 5                | 0 | 5   | 0 | 15                  | N/A    | 0.00E+00    | 102.9 (7)(19)(20)       |  |
| 59            | Q9DOA3      | UPF0552 protein C15orf38 homolog OS=Mus musculus PE=2 SV=1 - [CO038_MOUSE]                                                           | 0 | 5                | 0 | 6                | 0 | 4   | 0 | 15                  | N/A    | 9.78E-04    | 25.2                    |  |
| 60            | D3YWK1      | WD repeat domain phosphoinositide-interacting protein 2 OS=Mus musculus GN=Wipi2 PE=4 SV=1 - [D3YWK1_MOUSE]                          | 0 | 7                | 0 | 4                | 0 | 4   | 0 | 15                  | N/A    | 7.49E-03    | 46.4                    |  |
| 61            | Q6P5D8      | Structural maintenance of chromosomes flexible hinge domain-containing protein 1 OS=Mus musculus GN=Smchd1 PE=2 SV=2 - [SMHD1_MOUSE] | 0 | 5                | 0 | 3                | 0 | 6   | 0 | 14                  | N/A    | 6.12E-03    | 225.5 (16)(20)          |  |
| 62            | Q03963      | Interferon-induced, double-stranded RNA-activated protein kinase OS=Mus musculus GN=EIF2ak2 PE=1 SV=2 - [E2AK2_MOUSE]                | 0 | 6                | 0 | 4                | 0 | 4   | 0 | 14                  | N/A    | 2.19E-03    | 58.2 (16)(20)           |  |
| 63            | Q92511      | ATPase family AAA domain-containing protein 3 OS=Mus musculus GN=Atad3 PE=1 SV=1 - [ATAD3_MOUSE]                                     | 0 | 4                | 0 | 7                | 0 | 3   | 0 | 14                  | N/A    | 1.78E-02    | 66.7 (19)               |  |
| 64            | E9Q066      | La-related protein 4 OS=Mus musculus GN=Larp4 PE=4 SV=1 - [E9Q066_MOUSE]                                                             | 0 | 7                | 0 | 4                | 0 | 3   | 0 | 14                  | N/A    | 1.78E-02    | 79.6 (20)               |  |
| 65            | Q8K3A9      | 75K snRNA methylphosphate capping enzyme OS=Mus musculus GN=Mepce PE=1 SV=2 - [MEPCE_MOUSE]                                          | 0 | 6                | 0 | 3                | 0 | 5   | 0 | 14                  | N/A    | 6.12E-03    | 72 (20)                 |  |
| 66            | Q9WVG6-2    | Isoform 2 of Histone-arginine methyltransferase CARM1 OS=Mus musculus GN=Carm1 - [CARM1_MOUSE]                                       | 0 | 2                | 0 | 6                | 0 | 6   | 0 | 14                  | N/A    | 2.49E-02    | 63.4 (4)(7)(12)(16)(20) |  |
| 67            | Q8BGW1      | Alpha-ketoglutarate-dependent dioxygenase FTO OS=Mus musculus GN=Fto PE=1 SV=1 - [FTO_MOUSE]                                         | 0 | 5                | 0 | 4                | 0 | 5   | 0 | 14                  | N/A    | 1.51E-04    | 58 (7)                  |  |
| 68            | P42669      | Transcriptional activator protein Pur-alpha OS=Mus musculus GN=Pura PE=1 SV=1 - [PURA_MOUSE]                                         | 0 | 8                | 0 | 3                | 0 | 3   | 0 | 14                  | N/A    | 4.88E-02    | 34.9 (7)(13)(20)        |  |
| 69            | Q99JF8      | PC4 and SFRS1-interacting protein OS=Mus musculus GN=Psp1 PE=1 SV=1 - [PSIP1_MOUSE]                                                  | 0 | 5                | 0 | 2                | 0 | 7   | 0 | 14                  | N/A    | 3.25E-02    | 59.7 (7)(16)(20)        |  |
| 70            | D3YYP4      | COUP transcription factor 2 OS=Mus musculus GN=Nr2f2 PE=4 SV=1 - [D3YYP4_MOUSE]                                                      | 0 | 5                | 0 | 3                | 0 | 6   | 0 | 14                  | N/A    | 6.12E-03    | 31.5                    |  |
| 71            | Q91V64      | Isochorismatase domain-containing protein 1 OS=Mus musculus GN=Isoc1 PE=2 SV=1 - [ISOC1_MOUSE]                                       | 0 | 7                | 0 | 3                | 0 | 4   | 0 | 14                  | N/A    | 1.78E-02    | 32                      |  |
| 72            | Q9WTP6-2    | Isoform 2 of Adenylate kinase 2, mitochondrial OS=Mus musculus GN=Ak2 - [KAD2_MOUSE]                                                 | 0 | 6                | 0 | 3                | 0 | 4   | 0 | 13                  | N/A    | 7.97E-03    | 25.6 (10)(16)(19)       |  |
| 73            | Q08582      | GTP-binding protein 1 OS=Mus musculus GN=Gtpbp1 PE=1 SV=2 - [GTPB1_MOUSE]                                                            | 0 | 3                | 0 | 5                | 0 | 5   | 0 | 13                  | N/A    | 2.89E-03    | 72.3 (16)               |  |
| 74            | Q9CR86      | Calcium-regulated heat stable protein 1 OS=Mus musculus GN=Carhsp1 PE=1 SV=1 - [CHSP1_MOUSE]                                         | 0 | 6                | 0 | 4                | 0 | 3   | 0 | 13                  | N/A    | 7.97E-03    | 16.1 (16)(20)           |  |
| 75            | Q9R0P5      | Dextrin OS=Mus musculus GN=Dstn PE=1 SV=3 - [DEST_MOUSE]                                                                             | 0 | 5                | 0 | 3                | 0 | 5   | 0 | 13                  | N/A    | 2.89E-03    | 18.5 (19)(20)           |  |
| 76            | P45377      | Aldose reductase-related protein 2 OS=Mus musculus GN=Akr1b8 PE=1 SV=2 - [ALD2_MOUSE]                                                | 0 | 4                | 0 | 4                | 0 | 5   | 0 | 13                  | N/A    | 2.02E-04    | 36.1 (19)(20)           |  |
| 77            | Q921Q7      | Ras and Rab interactor 1 OS=Mus musculus GN=Rin1 PE=1 SV=1 - [RIN1_MOUSE]                                                            | 0 | 4                | 0 | 6                | 0 | 3   | 0 | 13                  | N/A    | 7.97E-03    | 83 (20)                 |  |
| 78            | G3UZ44      | Paired mesoderm homeobox protein 1 OS=Mus musculus GN=Prrx1 PE=3 SV=1 - [G3UZ44_MOUSE]                                               | 0 | 6                | 0 | 3                | 0 | 4   | 0 | 13                  | N/A    | 7.97E-03    | 22.5 (20)               |  |
| 79            | Q91V12-2    | Isoform A of Cytosolic acyl coenzyme A thioester hydrolase OS=Mus musculus GN=Aco7 - [BACH_MOUSE]                                    | 0 | 4                | 0 | 4                | 0 | 5   | 0 | 13                  | N/A    | 2.02E-04    | 37.5 (4)(13)            |  |
| 80            | Q9JIH2      | Nuclear pore complex protein Nup50 OS=Mus musculus GN=Nup50 PE=1 SV=3 - [NUP50_MOUSE]                                                | 0 | 5                | 0 | 3                | 0 | 5   | 0 | 13                  | N/A    | 2.89E-03    | 49.5 (7)(16)(20)        |  |
| 81            | Q99K70      | Ras-related GTP-binding protein C OS=Mus musculus GN=Rragc PE=2 SV=1 - [RRAGC_MOUSE]                                                 | 0 | 2                | 0 | 5                | 0 | 6   | 0 | 13                  | N/A    | 2.26E-02    | 44.1 (7)(20)            |  |
| 82            | B0QZF8      | Ubiquitin carboxyl-terminal hydrolase 36 (Fragment) OS=Mus musculus GN=Usp36 PE=4 SV=1 - [B0QZF8_MOUSE]                              | 0 | 5                | 0 | 4                | 0 | 4   | 0 | 13                  | N/A    | 2.02E-04    | 96.5                    |  |
| 83            | D3YWS3      | Profilin OS=Mus musculus GN=Pfn2 PE=3 SV=1 - [D3YWS3_MOUSE]                                                                          | 0 | 5                | 0 | 4                | 0 | 4   | 0 | 13                  | N/A    | 2.02E-04    | 11.8                    |  |
| 84            | Q61239      | Protein farnesyltransferase/geranylgeranyltransferase type-1 subunit alpha OS=Mus musculus GN=Fnta PE=1 SV=1 - [FNNT_MOUSE]          | 0 | 5                | 0 | 5                | 0 | 3   | 0 | 13                  | N/A    | 2.89E-03    | 44                      |  |
| 85            | Q9JLV5      | Cullin-3 OS=Mus musculus GN=Cul3 PE=1 SV=1 - [CUL3_MOUSE]                                                                            | 0 | 6                | 0 | 3                | 0 | 4   | 0 | 13                  | N/A    | 7.97E-03    | 88.9                    |  |
| 86            | O55091      | Protein IMPACT OS=Mus musculus GN=Impact PE=1 SV=2 - [IMPCT_MOUSE]                                                                   | 0 | 4                | 0 | 4                | 0 | 4   | 0 | 12                  | N/A    | 0.00E+00    | 36.3 (19)(20)           |  |
| 87            | Q6NZD2      | Sorting nexin 1 OS=Mus musculus GN=Snx1 PE=2 SV=1 - [Q6NZD2_MOUSE]                                                                   | 0 | 4                | 0 | 4                | 0 | 4   | 0 | 12                  | N/A    | 0.00E+00    | 58.8 (20)               |  |
| 88            | Q8K1M6-3    | Isoform 3 of Dynamin-1-like protein OS=Mus musculus GN=Dnm1l - [DNM1L_MOUSE]                                                         | 0 | 6                | 0 | 3                | 0 | 3   | 0 | 12                  | N/A    | 1.61E-02    | 78 (4)(20)              |  |
| 89            | Q3U308      | Cytoplasmic tRNA 2-thiolation protein 2 OS=Mus musculus GN=Ctu2 PE=2 SV=1 - [CTU2_MOUSE]                                             | 0 | 4                | 0 | 4                | 0 | 4   | 0 | 12                  | N/A    | 0.00E+00    | 56.1 (7)(16)            |  |
| 90            | Q3UHD6-2    | Isoform 2 of Sorting nexin-27 OS=Mus musculus GN=Snx27 - [SNX27_MOUSE]                                                               | 0 | 5                | 0 | 3                | 0 | 4   | 0 | 12                  | N/A    | 2.28E-03    | 59.5 (7)(16)            |  |
| 91            | Q8K298      | Actin-binding protein anillin OS=Mus musculus GN=Anln PE=1 SV=2 - [ANLN_MOUSE]                                                       | 0 | 5                | 0 | 2                | 0 | 5   | 0 | 12                  | N/A    | 1.61E-02    | 122.7 (7)(19)(20)       |  |



|               |                                                                                                                                        | 2AzGlcNAc       |   |              |   |              |   |     |    |                  |          |          |                       |  |  |
|---------------|----------------------------------------------------------------------------------------------------------------------------------------|-----------------|---|--------------|---|--------------|---|-----|----|------------------|----------|----------|-----------------------|--|--|
|               |                                                                                                                                        | Spectral Counts |   |              |   |              |   |     |    |                  |          |          |                       |  |  |
|               |                                                                                                                                        | Experiment 1    |   | Experiment 2 |   | Experiment 3 |   | Sum |    |                  |          |          |                       |  |  |
| Accession No. | Description                                                                                                                            | -               | + | -            | + | -            | + | -   | +  | Enrichment Ratio | T-Test   | MW [kDa] | Previously Identified |  |  |
| 92            | Q3U0V2 Tumor necrosis factor receptor type 1-associated DEATH domain protein OS=Mus musculus GN=Tradd PE=1 SV=1 - [TRADD_MOUSE]        | 0               | 4 | 0            | 4 | 0            | 4 | 0   | 12 | N/A              | 0.00E+00 | 34.6     |                       |  |  |
| 93            | Q9JK92 Heat shock protein beta-8 OS=Mus musculus GN=Hspb8 PE=1 SV=1 - [HSPB8_MOUSE]                                                    | 0               | 5 | 0            | 3 | 0            | 3 | 0   | 11 | N/A              | 5.33E-03 | 21.5     | (10)                  |  |  |
| 94            | Q99LP6 GrpE protein homolog 1, mitochondrial OS=Mus musculus GN=Grpel1 PE=1 SV=1 - [GRPE1_MOUSE]                                       | 0               | 2 | 0            | 4 | 0            | 5 | 0   | 11 | N/A              | 1.42E-02 | 24.3     | (16)                  |  |  |
| 95            | Q9D281 Protein Noxp20 OS=Mus musculus GN=Fam114a1 PE=2 SV=1 - [NXP20_MOUSE]                                                            | 0               | 2 | 0            | 4 | 0            | 5 | 0   | 11 | N/A              | 1.42E-02 | 61       | (16)(19)              |  |  |
| 96            | O09172 Glutamate-cysteine ligase regulatory subunit OS=Mus musculus GN=Gclm PE=2 SV=1 - [GSH0_MOUSE]                                   | 0               | 2 | 0            | 6 | 0            | 3 | 0   | 11 | N/A              | 3.80E-02 | 30.5     | (16)(19)(20)          |  |  |
| 97            | Q8R2M2 Deoxynucleotidyltransferase terminal-interacting protein 2 OS=Mus musculus GN=Dnttip2 PE=1 SV=1 - [TDIF2_MOUSE]                 | 0               | 5 | 0            | 2 | 0            | 4 | 0   | 11 | N/A              | 1.42E-02 | 84.2     | (16)(20)              |  |  |
| 98            | Q9QYA2 Mitochondrial import receptor subunit TOM40 homolog OS=Mus musculus GN=Tomm40 PE=1 SV=3 - [TOM40_MOUSE]                         | 0               | 2 | 0            | 5 | 0            | 4 | 0   | 11 | N/A              | 1.42E-02 | 37.9     | (16)(20)              |  |  |
| 99            | A5A4Y9 Protein phosphatase 1 regulatory subunit 11 OS=Mus musculus GN=Ppp1r11 PE=2 SV=1 - [A5A4Y9_MOUSE]                               | 0               | 4 | 0            | 4 | 0            | 3 | 0   | 11 | N/A              | 3.88E-04 | 14.5     | (19)                  |  |  |
| 100           | Q99K51 Plastin-3 OS=Mus musculus GN=Pls3 PE=1 SV=3 - [PLST_MOUSE]                                                                      | 0               | 5 | 0            | 4 | 0            | 2 | 0   | 11 | N/A              | 1.42E-02 | 70.7     | (20)                  |  |  |
| 101           | Q6ZQK5-2 Isoform 2 of Arf-GAP with coiled-coil, ANK repeat and PH domain-containing protein 2 OS=Mus musculus GN=Acap2 - [ACAP2_MOUSE] | 0               | 6 | 0            | 3 | 0            | 2 | 0   | 11 | N/A              | 3.80E-02 | 85.1     | (20)                  |  |  |
| 102           | Q61553 Fascin OS=Mus musculus GN=Fscn1 PE=1 SV=4 - [FSCN1_MOUSE]                                                                       | 0               | 3 | 0            | 5 | 0            | 3 | 0   | 11 | N/A              | 5.33E-03 | 54.5     | (4)(7)(10)            |  |  |
| 103           | Q9Z1Y4 Thyroid receptor-interacting protein 6 OS=Mus musculus GN=Trip6 PE=1 SV=1 - [TRIP6_MOUSE]                                       | 0               | 2 | 0            | 6 | 0            | 3 | 0   | 11 | N/A              | 3.80E-02 | 50.9     | (7)(16)               |  |  |
| 104           | Q9DBR0 A-kinase anchor protein 8 OS=Mus musculus GN=Akap8 PE=1 SV=1 - [AKAP8_MOUSE]                                                    | 0               | 4 | 0            | 3 | 0            | 4 | 0   | 11 | N/A              | 3.88E-04 | 76.2     | (7)(20)               |  |  |
| 105           | A2RSY6-2 Isoform 2 of TRMT1-like protein OS=Mus musculus GN=Trmt1l - [TRM1L_MOUSE]                                                     | 0               | 3 | 0            | 4 | 0            | 4 | 0   | 11 | N/A              | 3.88E-04 | 74.5     |                       |  |  |
| 106           | Q9D287 Pre-mRNA-splicing factor SPF27 OS=Mus musculus GN=Bcas2 PE=2 SV=1 - [SPF27_MOUSE]                                               | 0               | 4 | 0            | 3 | 0            | 4 | 0   | 11 | N/A              | 3.88E-04 | 26.1     |                       |  |  |
| 107           | Q8VCW8 Acyl-CoA synthetase family member 2, mitochondrial OS=Mus musculus GN=Acsf2 PE=2 SV=1 - [ACSF2_MOUSE]                           | 0               | 3 | 0            | 3 | 0            | 5 | 0   | 11 | N/A              | 5.33E-03 | 67.9     |                       |  |  |
| 108           | A2AJ72 Far upstream element (FUSE) binding protein 3 OS=Mus musculus GN=Fubp3 PE=4 SV=1 - [A2AJ72_MOUSE]                               | 0               | 5 | 0            | 3 | 0            | 3 | 0   | 11 | N/A              | 5.33E-03 | 61.4     |                       |  |  |
| 109           | Q77QH0-3 Isoform 3 of Ataxin-2-like protein OS=Mus musculus GN=Atxn2l - [ATX2L_MOUSE]                                                  | 0               | 4 | 0            | 3 | 0            | 3 | 0   | 10 | N/A              | 5.62E-04 | 109.9    | (1)(12)(13)(16)(20)   |  |  |
| 110           | O88844 Isocitrate dehydrogenase [NADP] cytoplasmic OS=Mus musculus GN=Idh1 PE=1 SV=2 - [IDHC_MOUSE]                                    | 0               | 3 | 0            | 2 | 0            | 5 | 0   | 10 | N/A              | 1.94E-02 | 46.6     | (10)(19)              |  |  |
| 111           | Q80VD1 Protein FAM98B OS=Mus musculus GN=Fam98b PE=2 SV=1 - [FA98B_MOUSE]                                                              | 0               | 4 | 0            | 3 | 0            | 3 | 0   | 10 | N/A              | 5.62E-04 | 45.3     | (12)(19)              |  |  |
| 112           | Q3UMF0-4 Isoform 4 of Cordon-bleu protein-like 1 OS=Mus musculus GN=Cobl1l - [COBL1_MOUSE]                                             | 0               | 3 | 0            | 3 | 0            | 4 | 0   | 10 | N/A              | 5.62E-04 | 129.5    | (20)                  |  |  |
| 113           | B7ZP47 Wapal protein OS=Mus musculus GN=Wapal PE=2 SV=1 - [B7ZP47_MOUSE]                                                               | 0               | 2 | 0            | 4 | 0            | 4 | 0   | 10 | N/A              | 7.49E-03 | 133.3    | (20)                  |  |  |
| 114           | F8WGW3 S1 RNA-binding domain-containing protein 1 OS=Mus musculus GN=Srbd1 PE=4 SV=1 - [F8WGW3_MOUSE]                                  | 0               | 3 | 0            | 4 | 0            | 3 | 0   | 10 | N/A              | 5.62E-04 | 110.1    | (20)                  |  |  |
| 115           | E9Q4Q2 Splicing factor 1 OS=Mus musculus GN=Sf1 PE=4 SV=1 - [E9Q4Q2_MOUSE]                                                             | 0               | 3 | 0            | 4 | 0            | 3 | 0   | 10 | N/A              | 5.62E-04 | 59.7     | (20)                  |  |  |
| 116           | Q8R409 Protein HEXIM1 OS=Mus musculus GN=Hexim1 PE=1 SV=1 - [HEX1_MOUSE]                                                               | 0               | 3 | 0            | 3 | 0            | 4 | 0   | 10 | N/A              | 5.62E-04 | 40.2     | (20)                  |  |  |
| 117           | P31938 Dual specificity mitogen-activated protein kinase kinase 1 OS=Mus musculus GN=Map2k1 PE=1 SV=2 - [MP2K1_MOUSE]                  | 0               | 4 | 0            | 4 | 0            | 2 | 0   | 10 | N/A              | 7.49E-03 | 43.4     | (20)                  |  |  |
| 118           | P54731 FAS-associated factor 1 OS=Mus musculus GN=Faf1 PE=1 SV=2 - [FAF1_MOUSE]                                                        | 0               | 4 | 0            | 3 | 0            | 3 | 0   | 10 | N/A              | 5.62E-04 | 73.8     | (7)                   |  |  |
| 119           | A2BE28-2 Isoform 2 of Ribosomal biogenesis protein LAS1L OS=Mus musculus GN=Las1l - [LAS1L_MOUSE]                                      | 0               | 5 | 0            | 2 | 0            | 3 | 0   | 10 | N/A              | 1.94E-02 | 87.5     | (7)(16)(20)           |  |  |
| 120           | A2AJ11 Microtubule-associated protein 7 domain containing 1 OS=Mus musculus GN=Mtap7d1 PE=4 SV=1 - [A2AJ11_MOUSE]                      | 0               | 2 | 0            | 4 | 0            | 4 | 0   | 10 | N/A              | 7.49E-03 | 85.7     |                       |  |  |
| 121           | D3YUC0 DNA ligase (Fragment) OS=Mus musculus GN=Lig1 PE=3 SV=1 - [D3YUC0_MOUSE]                                                        | 0               | 3 | 0            | 5 | 0            | 2 | 0   | 10 | N/A              | 1.94E-02 | 76.3     |                       |  |  |
| 122           | P97363 Serine palmitoyltransferase 2 OS=Mus musculus GN=Sptlc2 PE=2 SV=2 - [SPTC2_MOUSE]                                               | 0               | 5 | 0            | 3 | 0            | 2 | 0   | 10 | N/A              | 1.94E-02 | 62.9     |                       |  |  |
| 123           | P34022 Ran-specific GTPase-activating protein OS=Mus musculus GN=Ranbp1 PE=1 SV=2 - [RANG_MOUSE]                                       | 0               | 2 | 0            | 2 | 0            | 5 | 0   | 9  | N/A              | 3.99E-02 | 23.6     | (12)(16)(19)(20)      |  |  |
| 124           | Q64737 Trifunctional purine biosynthetic protein adenosine-3 OS=Mus musculus GN=Gart PE=2 SV=3 - [PUR2_MOUSE]                          | 0               | 3 | 0            | 3 | 0            | 3 | 0   | 9  | N/A              | 0.00E+00 | 107.4    | (16)(19)(20)          |  |  |
| 125           | Q8C156 Condensin complex subunit 2 OS=Mus musculus GN=Ncaph PE=2 SV=1 - [CND2_MOUSE]                                                   | 0               | 2 | 0            | 5 | 0            | 2 | 0   | 9  | N/A              | 3.99E-02 | 82.3     | (16)(20)              |  |  |
| 126           | Q3UY34 Uncharacterized protein C12orf43 homolog OS=Mus musculus GN=C12orf43 PE=2 SV=1 - [CL043_MOUSE]                                  | 0               | 2 | 0            | 3 | 0            | 4 | 0   | 9  | N/A              | 6.53E-03 | 27.6     | (16)(20)              |  |  |
| 127           | Q0VGB7 Serine/threonine-protein phosphatase 4 regulatory subunit 2 OS=Mus musculus GN=Ppp4r2 PE=1 SV=1 - [PP4R2_MOUSE]                 | 0               | 2 | 0            | 2 | 0            | 5 | 0   | 9  | N/A              | 3.99E-02 | 46.4     | (16)(20)              |  |  |
| 128           | Q3TFP0 FUS interacting protein (Serine-arginine rich) 1 OS=Mus musculus GN=Srsf10 PE=2 SV=1 - [Q3TFP0_MOUSE]                           | 0               | 4 | 0            | 3 | 0            | 2 | 0   | 9  | N/A              | 6.53E-03 | 22.1     | (20)                  |  |  |
| 129           | Q9DCH4 Eukaryotic translation initiation factor 3 subunit F OS=Mus musculus GN=EIF3f PE=1 SV=2 - [EIF3F_MOUSE]                         | 0               | 3 | 0            | 3 | 0            | 3 | 0   | 9  | N/A              | 0.00E+00 | 38       | (7)                   |  |  |
| 130           | Q8BGE6 Cysteine protease ATG4B OS=Mus musculus GN=Atg4b PE=1 SV=2 - [ATG4B_MOUSE]                                                      | 0               | 4 | 0            | 2 | 0            | 3 | 0   | 9  | N/A              | 6.53E-03 | 44.3     | (7)                   |  |  |
| 131           | Q3UJB9-2 Isoform 2 of Enhancer of mRNA-decapping protein 4 OS=Mus musculus GN=Edc4 - [EDC4_MOUSE]                                      | 0               | 4 | 0            | 2 | 0            | 3 | 0   | 9  | N/A              | 6.53E-03 | 150.6    | (7)(16)               |  |  |
| 132           | Q6PGH2 Hematological and neurological expressed 1-like protein OS=Mus musculus GN=Hn1l PE=2 SV=1 - [HN1L_MOUSE]                        | 0               | 3 | 0            | 3 | 0            | 3 | 0   | 9  | N/A              | 0.00E+00 | 20       | (7)(16)(19)(20)       |  |  |
| 133           | Q3UND0 Src kinase-associated phosphoprotein 2 OS=Mus musculus GN=Skap2 PE=1 SV=2 - [SKAP2_MOUSE]                                       | 0               | 3 | 0            | 3 | 0            | 3 | 0   | 9  | N/A              | 0.00E+00 | 40.7     |                       |  |  |
| 134           | Q99KC8 von Willebrand factor A domain-containing protein 5A OS=Mus musculus GN=Vwa5a PE=1 SV=2 - [VMA5A_MOUSE]                         | 0               | 3 | 0            | 2 | 0            | 4 | 0   | 9  | N/A              | 6.53E-03 | 87.1     |                       |  |  |
| 135           | B1AVZ0 Uracil phosphoribosyltransferase homolog OS=Mus musculus GN=Uprt PE=2 SV=1 - [UPP_MOUSE]                                        | 0               | 2 | 0            | 4 | 0            | 3 | 0   | 9  | N/A              | 6.53E-03 | 34.3     |                       |  |  |
| 136           | Q8CDJ8 Stonin-1 OS=Mus musculus GN=Ston1 PE=2 SV=2 - [STON1_MOUSE]                                                                     | 0               | 2 | 0            | 4 | 0            | 3 | 0   | 9  | N/A              | 6.53E-03 | 81.7     |                       |  |  |
| 137           | Q99LR1 Monoacylglycerol lipase ABHD12 OS=Mus musculus GN=Abhd12 PE=1 SV=2 - [ABD12_MOUSE]                                              | 0               | 3 | 0            | 4 | 0            | 2 | 0   | 9  | N/A              | 6.53E-03 | 45.2     |                       |  |  |
| 138           | Q61846 Maternal embryonic leucine zipper kinase OS=Mus musculus GN=Melk PE=1 SV=2 - [MELK_MOUSE]                                       | 0               | 4 | 0            | 3 | 0            | 2 | 0   | 9  | N/A              | 6.53E-03 | 72.7     |                       |  |  |
| 139           | Q7TSJ2-3 Isoform 3 of Microtubule-associated protein 6 OS=Mus musculus GN=Map6 - [MAP6_MOUSE]                                          | 0               | 2 | 0            | 2 | 0            | 4 | 0   | 8  | N/A              | 1.61E-02 | 32.8     | (1)(4)(13)(20)        |  |  |
| 140           | G3X972 Protein Sec24c OS=Mus musculus GN=Sec24c PE=4 SV=1 - [G3X972_MOUSE]                                                             | 0               | 3 | 0            | 1 | 0            | 4 | 0   | 8  | N/A              | 3.90E-02 | 118.5    | (2)(20)               |  |  |
| 141           | Q8K354 Carbonyl reductase [NADPH] 3 OS=Mus musculus GN=Cbr3 PE=2 SV=1 - [CBR3_MOUSE]                                                   | 0               | 3 | 0            | 2 | 0            | 3 | 0   | 8  | N/A              | 1.32E-03 | 30.9     | (20)                  |  |  |

|               |                                                                                                                                      | 2AzGlcNAc       |   |              |   |              |   |     |   |                  |          |                         |                       |
|---------------|--------------------------------------------------------------------------------------------------------------------------------------|-----------------|---|--------------|---|--------------|---|-----|---|------------------|----------|-------------------------|-----------------------|
|               |                                                                                                                                      | Spectral Counts |   |              |   |              |   |     |   |                  |          |                         |                       |
|               |                                                                                                                                      | Experiment 1    |   | Experiment 2 |   | Experiment 3 |   | Sum |   |                  |          |                         |                       |
| Accession No. | Description                                                                                                                          | -               | + | -            | + | -            | + | -   | + | Enrichment Ratio | T-Test   | MW [kDa]                | Previously Identified |
| 142           | E9Q7W0 Recombining-binding protein suppressor of hairless OS=Mus musculus GN=Rbpj PE=4 SV=1 - [E9Q7W0_MOUSE]                         | 0               | 2 | 0            | 2 | 0            | 4 | 0   | 8 | N/A              | 1.61E-02 | 54.3 (20)               |                       |
| 143           | Q61686 Chromobox protein homolog 5 OS=Mus musculus GN=Cbx5 PE=1 SV=1 - [CBX5_MOUSE]                                                  | 0               | 2 | 0            | 3 | 0            | 3 | 0   | 8 | N/A              | 1.32E-03 | 22.2 (7)(16)(19)        |                       |
| 144           | O08997 Copper transport protein ATOX1 OS=Mus musculus GN=Atox1 PE=2 SV=1 - [ATOX1_MOUSE]                                             | 0               | 2 | 0            | 2 | 0            | 4 | 0   | 8 | N/A              | 1.61E-02 | 7.3 (7)(16)(20)         |                       |
| 145           | Q9CQ13 Coordinator of PRMT5 and differentiation stimulator OS=Mus musculus GN=Coprs PE=1 SV=1 - [COPRS_MOUSE]                        | 0               | 3 | 0            | 2 | 0            | 3 | 0   | 8 | N/A              | 1.32E-03 | 18.7                    |                       |
| 146           | A2AUR3 Phosphotriesterase related (Fragment) OS=Mus musculus GN=Pter PE=4 SV=1 - [A2AUR3_MOUSE]                                      | 0               | 3 | 0            | 3 | 0            | 2 | 0   | 8 | N/A              | 1.32E-03 | 19.9                    |                       |
| 147           | P53702 Cytochrome c-type heme lyase OS=Mus musculus GN=Hccs PE=2 SV=2 - [CCHL_MOUSE]                                                 | 0               | 3 | 0            | 3 | 0            | 2 | 0   | 8 | N/A              | 1.32E-03 | 31                      |                       |
| 148           | Q9CXT8 Mitochondrial-processing peptidase subunit beta OS=Mus musculus GN=Pmpcb PE=2 SV=1 - [MPPB_MOUSE]                             | 0               | 3 | 0            | 3 | 0            | 2 | 0   | 8 | N/A              | 1.32E-03 | 54.6                    |                       |
| 149           | Q922Q1 MOSC domain-containing protein 2, mitochondrial OS=Mus musculus GN=Marc2 PE=1 SV=1 - [MOSC2_MOUSE]                            | 0               | 2 | 0            | 2 | 0            | 4 | 0   | 8 | N/A              | 1.61E-02 | 38.2                    |                       |
| 150           | Q5SUW3 Growth factor receptor bound protein 10 OS=Mus musculus GN=Grb10 PE=2 SV=1 - [Q5SUW3_MOUSE]                                   | 0               | 2 | 0            | 4 | 0            | 2 | 0   | 8 | N/A              | 1.61E-02 | 62.2                    |                       |
| 151           | Q45VK5 Interleukin enhancer-binding factor 3 OS=Mus musculus GN=Ilf3 PE=2 SV=1 - [Q45VK5_MOUSE]                                      | 0               | 4 | 0            | 2 | 0            | 2 | 0   | 8 | N/A              | 1.61E-02 | 76.3                    |                       |
| 152           | Q9DBG5 Perilipin-3 OS=Mus musculus GN=Plin3 PE=1 SV=1 - [PLIN3_MOUSE]                                                                | 0               | 3 | 0            | 3 | 0            | 1 | 0   | 7 | N/A              | 2.49E-02 | 47.2 (1)(7)(13)(16)(20) |                       |
| 153           | Q91WE2 Protein FAM192A OS=Mus musculus GN=Fam192a PE=2 SV=1 - [F192A_MOUSE]                                                          | 0               | 2 | 0            | 3 | 0            | 2 | 0   | 7 | N/A              | 2.19E-03 | 28.7 (16)               |                       |
| 154           | Q61187 Tumor susceptibility gene 101 protein OS=Mus musculus GN=Tsg101 PE=1 SV=2 - [TS101_MOUSE]                                     | 0               | 3 | 0            | 2 | 0            | 2 | 0   | 7 | N/A              | 2.19E-03 | 44.1 (16)               |                       |
| 155           | Q9QWF0 Chromatin assembly factor 1 subunit A OS=Mus musculus GN=Chaf1a PE=1 SV=1 - [CAF1A_MOUSE]                                     | 0               | 3 | 0            | 2 | 0            | 2 | 0   | 7 | N/A              | 2.19E-03 | 101.9 (16)(20)          |                       |
| 156           | Q8BPB5 EGF-containing fibulin-like extracellular matrix protein 1 OS=Mus musculus GN=Efemp1 PE=2 SV=1 - [FBLN3_MOUSE]                | 0               | 2 | 0            | 3 | 0            | 2 | 0   | 7 | N/A              | 2.19E-03 | 54.9 (20)               |                       |
| 157           | P54729 NEDD8 ultimate buster 1 OS=Mus musculus GN=Nub1 PE=1 SV=2 - [NUB1_MOUSE]                                                      | 0               | 2 | 0            | 3 | 0            | 2 | 0   | 7 | N/A              | 2.19E-03 | 70.3 (20)               |                       |
| 158           | E9PX53 Serine/threonine-protein phosphatase 4 regulatory subunit 1 OS=Mus musculus GN=Ppp4r1 PE=4 SV=1 - [E9PX53_MOUSE]              | 0               | 2 | 0            | 2 | 0            | 3 | 0   | 7 | N/A              | 2.19E-03 | 104.4 (20)              |                       |
| 159           | O88447 Kinesin light chain 1 OS=Mus musculus GN=Klc1 PE=1 SV=3 - [KLC1_MOUSE]                                                        | 0               | 2 | 0            | 2 | 0            | 3 | 0   | 7 | N/A              | 2.19E-03 | 61.4 (7)                |                       |
| 160           | A2AF81 AHA1, activator of heat shock protein ATPase homolog 2 (Yeast) (Fragment) OS=Mus musculus GN=Ahsa2 PE=4 SV=1 - [A2AF81_MOUSE] | 0               | 2 | 0            | 2 | 0            | 3 | 0   | 7 | N/A              | 2.19E-03 | 22.4                    |                       |
| 161           | B8JJC1 Tyrosyl-DNA phosphodiesterase 1 OS=Mus musculus GN=Tdp1 PE=4 SV=1 - [B8JJC1_MOUSE]                                            | 0               | 2 | 0            | 2 | 0            | 3 | 0   | 7 | N/A              | 2.19E-03 | 68.5                    |                       |
| 162           | Q9JM13 Rab5 GDP/GTP exchange factor OS=Mus musculus GN=Rabgef1 PE=1 SV=1 - [RABX5_MOUSE]                                             | 0               | 2 | 0            | 2 | 0            | 3 | 0   | 7 | N/A              | 2.19E-03 | 56.8                    |                       |
| 163           | O54910 NF-kappa-B inhibitor epsilon OS=Mus musculus GN=Nfkbie PE=2 SV=2 - [IKBE_MOUSE]                                               | 0               | 2 | 0            | 3 | 0            | 2 | 0   | 7 | N/A              | 2.19E-03 | 39.2                    |                       |
| 164           | P61211 ADP-ribosylation factor-like protein 1 OS=Mus musculus GN=Ar11 PE=2 SV=1 - [ARL1_MOUSE]                                       | 0               | 3 | 0            | 2 | 0            | 2 | 0   | 7 | N/A              | 2.19E-03 | 20.4                    |                       |
| 165           | Q8CIH9 Amidophosphoribosyltransferase OS=Mus musculus GN=Ppat PE=2 SV=1 - [Q8CIH9_MOUSE]                                             | 0               | 3 | 0            | 2 | 0            | 2 | 0   | 7 | N/A              | 2.19E-03 | 57.4                    |                       |
| 166           | Q8K0C7 Oxysterol-binding protein OS=Mus musculus GN=Osbp2 PE=2 SV=1 - [Q8K0C7_MOUSE]                                                 | 0               | 3 | 0            | 2 | 0            | 2 | 0   | 7 | N/A              | 2.19E-03 | 52.1                    |                       |
| 167           | A6PWC3 Nardilysin OS=Mus musculus GN=Nrd1 PE=3 SV=1 - [A6PWC3_MOUSE]                                                                 | 0               | 3 | 0            | 1 | 0            | 3 | 0   | 7 | N/A              | 2.49E-02 | 127.7                   |                       |
| 168           | P06537-3 Isoform 1-B of Glucocorticoid receptor OS=Mus musculus GN=Nr3c1 - [GCR_MOUSE]                                               | 0               | 3 | 0            | 1 | 0            | 2 | 0   | 6 | N/A              | 2.57E-02 | 83.2 (1)                |                       |
| 169           | Q8VHR5 Transcriptional repressor p66-beta OS=Mus musculus GN=Gatad2b PE=1 SV=1 - [P66B_MOUSE]                                        | 0               | 2 | 0            | 3 | 0            | 1 | 0   | 6 | N/A              | 2.57E-02 | 65.4 (1)(13)(16)(20)    |                       |
| 170           | Q61818-2 Isoform 2 of Retinoic acid-induced protein 1 OS=Mus musculus GN=Rai1 - [RAI1_MOUSE]                                         | 0               | 3 | 0            | 1 | 0            | 2 | 0   | 6 | N/A              | 2.57E-02 | 196 (1)(7)(16)          |                       |
| 171           | O54988-2 Isoform 2 of STE20-like serine/threonine-protein kinase OS=Mus musculus GN=Silk - [SLK_MOUSE]                               | 0               | 2 | 0            | 1 | 0            | 3 | 0   | 6 | N/A              | 2.57E-02 | 137.6 (10)(13)(19)(20)  |                       |
| 172           | Q7TT37 Elongator complex protein 1 OS=Mus musculus GN=Ikbkap PE=2 SV=2 - [ELP1_MOUSE]                                                | 0               | 2 | 0            | 3 | 0            | 1 | 0   | 6 | N/A              | 2.57E-02 | 149.5 (13)              |                       |
| 173           | O9QYI3 DnaJ homolog subfamily C member 7 OS=Mus musculus GN=Dnajc7 PE=1 SV=2 - [DNJC7_MOUSE]                                         | 0               | 2 | 0            | 3 | 0            | 1 | 0   | 6 | N/A              | 2.57E-02 | 56.4 (16)               |                       |
| 174           | Q9CYA6 Zinc finger CCHC domain-containing protein 8 OS=Mus musculus GN=Zcchc8 PE=2 SV=3 - [ZCHC8_MOUSE]                              | 0               | 2 | 0            | 3 | 0            | 1 | 0   | 6 | N/A              | 2.57E-02 | 78 (16)(20)             |                       |
| 175           | Q9CXF4 TBC1 domain family member 15 OS=Mus musculus GN=Tbc1d15 PE=1 SV=1 - [TBC15_MOUSE]                                             | 0               | 2 | 0            | 2 | 0            | 2 | 0   | 6 | N/A              | 0.00E+00 | 76.5 (16)(20)           |                       |
| 176           | P63028 Translationally-controlled tumor protein OS=Mus musculus GN=Tpt1 PE=1 SV=1 - [TCTP_MOUSE]                                     | 0               | 2 | 0            | 2 | 0            | 2 | 0   | 6 | N/A              | 0.00E+00 | 19.4 (19)               |                       |
| 177           | Q8K1C9 Leucine-rich repeat-containing protein 41 OS=Mus musculus GN=Lrrc41 PE=1 SV=3 - [LRC41_MOUSE]                                 | 0               | 3 | 0            | 2 | 0            | 1 | 0   | 6 | N/A              | 2.57E-02 | 88.1 (19)               |                       |
| 178           | Q8C0V0 Serine/threonine-protein kinase tousled-like 1 OS=Mus musculus GN=Titk1 PE=2 SV=2 - [TLK1_MOUSE]                              | 0               | 2 | 0            | 2 | 0            | 2 | 0   | 6 | N/A              | 0.00E+00 | 86.6 (20)               |                       |
| 179           | Q6P2B1-3 Isoform 3 of Transportin-3 OS=Mus musculus GN=Tnpo3 - [TNPO3_MOUSE]                                                         | 0               | 1 | 0            | 3 | 0            | 2 | 0   | 6 | N/A              | 2.57E-02 | 29.9 (7)                |                       |
| 180           | Q05816 Fatty acid-binding protein, epidermal OS=Mus musculus GN=Fabp5 PE=1 SV=3 - [FABP5_MOUSE]                                      | 0               | 2 | 0            | 2 | 0            | 2 | 0   | 6 | N/A              | 0.00E+00 | 15.1 (7)(16)            |                       |
| 181           | Q9R060 Cytosolic Fe-S cluster assembly factor NUBP1 OS=Mus musculus GN=Nubp1 PE=1 SV=1 - [NUBP1_MOUSE]                               | 0               | 2 | 0            | 3 | 0            | 1 | 0   | 6 | N/A              | 2.57E-02 | 34.1 (7)(16)            |                       |
| 182           | Q6P5G6 UBX domain-containing protein 7 OS=Mus musculus GN=Ubxn7 PE=1 SV=2 - [UBXN7_MOUSE]                                            | 0               | 2 | 0            | 1 | 0            | 3 | 0   | 6 | N/A              | 2.57E-02 | 52.1 (7)(16)(20)        |                       |
| 183           | Q8BIW1 Protein prune homolog OS=Mus musculus GN=Prune PE=2 SV=1 - [PRUNE_MOUSE]                                                      | 0               | 2 | 0            | 2 | 0            | 2 | 0   | 6 | N/A              | 0.00E+00 | 50.2 (7)(16)(20)        |                       |
| 184           | Q8VCH8 UBX domain-containing protein 4 OS=Mus musculus GN=Ubxn4 PE=1 SV=1 - [UBXN4_MOUSE]                                            | 0               | 2 | 0            | 2 | 0            | 2 | 0   | 6 | N/A              | 0.00E+00 | 56.4 (7)(20)            |                       |
| 185           | P31324 cAMP-dependent protein kinase type II-beta regulatory subunit OS=Mus musculus GN=Prkar2b PE=1 SV=3 - [KAP3_MOUSE]             | 0               | 2 | 0            | 2 | 0            | 2 | 0   | 6 | N/A              | 0.00E+00 | 46.1                    |                       |
| 186           | Q8BLF1 Neutral cholesterol ester hydrolase 1 OS=Mus musculus GN=Nceh1 PE=1 SV=1 - [NCEH1_MOUSE]                                      | 0               | 2 | 0            | 2 | 0            | 2 | 0   | 6 | N/A              | 0.00E+00 | 45.7                    |                       |
| 187           | Q8C6P8-2 Isoform 2 of Zinc finger protein 57 OS=Mus musculus GN=Zfp57 - [ZFP57_MOUSE]                                                | 0               | 2 | 0            | 2 | 0            | 2 | 0   | 6 | N/A              | 0.00E+00 | 47.6                    |                       |
| 188           | Q9D8S4 Oligoribonuclease, mitochondrial OS=Mus musculus GN=Rexo2 PE=1 SV=2 - [ORN_MOUSE]                                             | 0               | 2 | 0            | 2 | 0            | 2 | 0   | 6 | N/A              | 0.00E+00 | 26.7                    |                       |
| 189           | Q8OU04-2 Isoform 2 of E3 ubiquitin-protein ligase Praja-2 OS=Mus musculus GN=Pja2 - [PJA2_MOUSE]                                     | 0               | 1 | 0            | 2 | 0            | 3 | 0   | 6 | N/A              | 2.57E-02 | 71.2                    |                       |
| 190           | Q80ZK9 WD and tetrapeptide repeats protein 1 OS=Mus musculus GN=Wdtdc1 PE=1 SV=1 - [WDTC1_MOUSE]                                     | 0               | 2 | 0            | 1 | 0            | 3 | 0   | 6 | N/A              | 2.57E-02 | 75.7                    |                       |
| 191           | Q99LM9 Transcriptional adapter 1 OS=Mus musculus GN=Tada1 PE=2 SV=1 - [TADA1_MOUSE]                                                  | 0               | 1 | 0            | 3 | 0            | 2 | 0   | 6 | N/A              | 2.57E-02 | 37.4                    |                       |
| 192           | Q8VEH6-2 Isoform 2 of COBW domain-containing protein 1 OS=Mus musculus GN=Cbwd1 - [CBWD1_MOUSE]                                      | 0               | 2 | 0            | 3 | 0            | 1 | 0   | 6 | N/A              | 2.57E-02 | 30.4                    |                       |
| 193           | A2AG39 Stomatin (Epb7.2)-like 2 (Fragment) OS=Mus musculus GN=Stoml2 PE=4 SV=1 - [A2AG39_MOUSE]                                      | 0               | 3 | 0            | 2 | 0            | 1 | 0   | 6 | N/A              | 2.57E-02 | 30.9                    |                       |
| 194           | O88796 Ribonuclease P protein subunit p30 OS=Mus musculus GN=Rpp30 PE=2 SV=1 - [RPP30_MOUSE]                                         | 0               | 3 | 0            | 2 | 0            | 1 | 0   | 6 | N/A              | 2.57E-02 | 29.5                    |                       |

|               |             | 2AzGlcNAc                                                                                                            |   |              |   |              |   |     |   |                  |        |          |                       |  |
|---------------|-------------|----------------------------------------------------------------------------------------------------------------------|---|--------------|---|--------------|---|-----|---|------------------|--------|----------|-----------------------|--|
|               |             | Spectral Counts                                                                                                      |   |              |   |              |   |     |   |                  |        |          |                       |  |
|               |             | Experiment 1                                                                                                         |   | Experiment 2 |   | Experiment 3 |   | Sum |   | Enrichment Ratio | T-Test | MW [kDa] | Previously Identified |  |
| Accession No. | Description | -                                                                                                                    | + | -            | + | -            | + | -   | + |                  |        |          |                       |  |
| 195           | Q6DFZ1      | Golgi-specific brefeldin A-resistance factor 1 OS=Mus musculus GN=Gbf1 PE=2 SV=1 - [Q6DFZ1_MOUSE]                    | 0 | 3            | 0 | 2            | 0 | 1   | 0 | 6                | N/A    | 2.57E-02 | 206.7                 |  |
| 196           | P24270      | Catalase OS=Mus musculus GN=Cat PE=1 SV=4 - [CATA_MOUSE]                                                             | 0 | 1            | 0 | 2            | 0 | 2   | 0 | 5                | N/A    | 7.49E-03 | 59.8 (11)             |  |
| 197           | Q68EF0      | Rab-3A-interacting protein OS=Mus musculus GN=Rab3ip PE=1 SV=1 - [RAB3I_MOUSE]                                       | 0 | 2            | 0 | 1            | 0 | 2   | 0 | 5                | N/A    | 7.49E-03 | 47.1 (16)             |  |
| 198           | Q923B1      | Lariat debranching enzyme OS=Mus musculus GN=Dbr1 PE=1 SV=2 - [DBR1_MOUSE]                                           | 0 | 2            | 0 | 2            | 0 | 1   | 0 | 5                | N/A    | 7.49E-03 | 62.3 (16)             |  |
| 199           | Q91YS8      | Calcium/calmodulin-dependent protein kinase type 1 OS=Mus musculus GN=Camk1 PE=1 SV=1 - [KCC1A_MOUSE]                | 0 | 2            | 0 | 1            | 0 | 2   | 0 | 5                | N/A    | 7.49E-03 | 41.6 (20)             |  |
| 200           | Q80UU9      | Membrane-associated progesterone receptor component 2 OS=Mus musculus GN=Pgrmc2 PE=1 SV=2 - [PGRC2_MOUSE]            | 0 | 2            | 0 | 2            | 0 | 1   | 0 | 5                | N/A    | 7.49E-03 | 23.3 (20)             |  |
| 201           | Q9CZP7-2    | Isoform 2 of Hsp90 co-chaperone Cdc37-like 1 OS=Mus musculus GN=Cdc37l1 - [CD37L_MOUSE]                              | 0 | 2            | 0 | 2            | 0 | 1   | 0 | 5                | N/A    | 7.49E-03 | 35.4 (20)             |  |
| 202           | P70445      | Eukaryotic translation initiation factor 4E-binding protein 2 OS=Mus musculus GN=Eif4ebp2 PE=2 SV=1 - [4EBP2_MOUSE]  | 0 | 2            | 0 | 2            | 0 | 1   | 0 | 5                | N/A    | 7.49E-03 | 12.9 (20)             |  |
| 203           | Q9J110      | Serine/threonine-protein kinase 3 OS=Mus musculus GN=Stk3 PE=1 SV=1 - [STK3_MOUSE]                                   | 0 | 1            | 0 | 2            | 0 | 2   | 0 | 5                | N/A    | 7.49E-03 | 56.8 (7)              |  |
| 204           | Q9D071-2    | Isoform 2 of MMS19 nucleotide excision repair protein homolog OS=Mus musculus GN=Mms19 - [MMS19_MOUSE]               | 0 | 2            | 0 | 1            | 0 | 2   | 0 | 5                | N/A    | 7.49E-03 | 97.4 (7)(16)          |  |
| 205           | A2AIW9      | Mitochondrial-processing peptidase subunit alpha OS=Mus musculus GN=Pmpca PE=3 SV=1 - [A2AIW9_MOUSE]                 | 0 | 1            | 0 | 2            | 0 | 2   | 0 | 5                | N/A    | 7.49E-03 | 48.4                  |  |
| 206           | O70503      | Estradiol 17-beta-dehydrogenase 12 OS=Mus musculus GN=Hsd17b12 PE=2 SV=1 - [DHB12_MOUSE]                             | 0 | 1            | 0 | 2            | 0 | 2   | 0 | 5                | N/A    | 7.49E-03 | 34.7                  |  |
| 207           | P28033      | CCAAT/enhancer-binding protein beta OS=Mus musculus GN=Cebp beta PE=1 SV=1 - [CEBPB_MOUSE]                           | 0 | 1            | 0 | 2            | 0 | 2   | 0 | 5                | N/A    | 7.49E-03 | 31.4                  |  |
| 208           | Q8BU85      | Methionine-R-sulfoxide reductase B3, mitochondrial OS=Mus musculus GN=Msrb3 PE=1 SV=2 - [MSRB3_MOUSE]                | 0 | 1            | 0 | 2            | 0 | 2   | 0 | 5                | N/A    | 7.49E-03 | 26.8                  |  |
| 209           | Q9ER81      | 15 kDa interferon-responsive protein OS=Mus musculus GN=Ifrg15 PE=2 SV=1 - [IFG15_MOUSE]                             | 0 | 1            | 0 | 2            | 0 | 2   | 0 | 5                | N/A    | 7.49E-03 | 15.3                  |  |
| 210           | Q9QZN4      | F-box only protein 6 OS=Mus musculus GN=Fbxo6 PE=1 SV=1 - [FBX6_MOUSE]                                               | 0 | 1            | 0 | 2            | 0 | 2   | 0 | 5                | N/A    | 7.49E-03 | 34.5                  |  |
| 211           | P63168      | Dynein light chain 1, cytoplasmic OS=Mus musculus GN=Dynll1 PE=1 SV=1 - [DYL1_MOUSE]                                 | 0 | 2            | 0 | 1            | 0 | 2   | 0 | 5                | N/A    | 7.49E-03 | 10.4                  |  |
| 212           | P52651      | Homeobox protein Rhox5 OS=Mus musculus GN=Rhox5 PE=2 SV=1 - [RHGX5_MOUSE]                                            | 0 | 2            | 0 | 2            | 0 | 1   | 0 | 5                | N/A    | 7.49E-03 | 23                    |  |
| 213           | Q6ZQ73      | Cullin-associated NEDD8-dissociated protein 2 OS=Mus musculus GN=Cand2 PE=1 SV=2 - [CAND2_MOUSE]                     | 0 | 2            | 0 | 2            | 0 | 1   | 0 | 5                | N/A    | 7.49E-03 | 135.5                 |  |
| 214           | Q8VCX5      | Calcium uptake protein 1, mitochondrial OS=Mus musculus GN=Micu1 PE=2 SV=1 - [MICU1_MOUSE]                           | 0 | 2            | 0 | 2            | 0 | 1   | 0 | 5                | N/A    | 7.49E-03 | 54.3                  |  |
| 215           | Q8C570      | mRNA export factor OS=Mus musculus GN=Rae1 PE=1 SV=1 - [RAE1_MOUSE]                                                  | 0 | 1            | 0 | 1            | 0 | 2   | 0 | 4                | N/A    | 1.61E-02 | 40.9 (12)             |  |
| 216           | P97765      | WW domain-binding protein 2 OS=Mus musculus GN=Wbp2 PE=1 SV=1 - [WBP2_MOUSE]                                         | 0 | 2            | 0 | 1            | 0 | 1   | 0 | 4                | N/A    | 1.61E-02 | 28 (13)               |  |
| 217           | Q8R1Q8      | Cytoplasmic dynein 1 light intermediate chain 1 OS=Mus musculus GN=Dync1l1 PE=1 SV=1 - [DC1L1_MOUSE]                 | 0 | 1            | 0 | 1            | 0 | 2   | 0 | 4                | N/A    | 1.61E-02 | 56.6 (13)(16)         |  |
| 218           | P56873      | Sjogren syndrome/scleroderma autoantigen 1 homolog OS=Mus musculus GN=Sssa1 PE=2 SV=1 - [SSA27_MOUSE]                | 0 | 1            | 0 | 2            | 0 | 1   | 0 | 4                | N/A    | 1.61E-02 | 21.3 (16)             |  |
| 219           | Q8BZW8      | NHL repeat-containing protein 2 OS=Mus musculus GN=Nhlrc2 PE=2 SV=1 - [NHLC2_MOUSE]                                  | 0 | 2            | 0 | 1            | 0 | 1   | 0 | 4                | N/A    | 1.61E-02 | 78.4 (16)             |  |
| 220           | Q9CR51      | V-type proton ATPase subunit G 1 OS=Mus musculus GN=Atp6v1g1 PE=2 SV=3 - [VATG1_MOUSE]                               | 0 | 1            | 0 | 2            | 0 | 1   | 0 | 4                | N/A    | 1.61E-02 | 13.7 (20)             |  |
| 221           | Q8BVY0      | Protein Rsl1d1 OS=Mus musculus GN=Rsl1d1 PE=2 SV=1 - [Q8BVY0_MOUSE]                                                  | 0 | 2            | 0 | 1            | 0 | 1   | 0 | 4                | N/A    | 1.61E-02 | 50.4 (20)             |  |
| 222           | P47930      | Fos-related antigen 2 OS=Mus musculus GN=Fosl2 PE=2 SV=2 - [FOSL2_MOUSE]                                             | 0 | 1            | 0 | 2            | 0 | 1   | 0 | 4                | N/A    | 1.61E-02 | 35.3 (20)             |  |
| 223           | Q9CRD0      | OCIA domain-containing protein 1 OS=Mus musculus GN=Ociad1 PE=1 SV=1 - [OCAD1_MOUSE]                                 | 0 | 2            | 0 | 1            | 0 | 1   | 0 | 4                | N/A    | 1.61E-02 | 27.6 (20)             |  |
| 224           | Q91WK5      | Glycine cleavage system H protein, mitochondrial OS=Mus musculus GN=Gcsh PE=1 SV=2 - [GCSH_MOUSE]                    | 0 | 1            | 0 | 2            | 0 | 1   | 0 | 4                | N/A    | 1.61E-02 | 18.6 (7)              |  |
| 225           | P25799-2    | Isoform 2 of Nuclear factor NF-kappa-B p105 subunit OS=Mus musculus GN=Nfkb1 - [NFKB1_MOUSE]                         | 0 | 1            | 0 | 1            | 0 | 2   | 0 | 4                | N/A    | 1.61E-02 | 84.8 (7)(10)          |  |
| 226           | Q8BVQ5      | Protein phosphatase methyltransferase 1 OS=Mus musculus GN=Ppme1 PE=1 SV=5 - [PPME1_MOUSE]                           | 0 | 1            | 0 | 1            | 0 | 2   | 0 | 4                | N/A    | 1.61E-02 | 42.2 (7)(10)(16)      |  |
| 227           | P42225      | Signal transducer and activator of transcription 1 OS=Mus musculus GN=Stat1 PE=1 SV=1 - [STAT1_MOUSE]                | 0 | 1            | 0 | 2            | 0 | 1   | 0 | 4                | N/A    | 1.61E-02 | 87.1 (7)(16)          |  |
| 228           | Q9CXG3      | Peptidyl-prolyl cis-trans isomerase-like 4 OS=Mus musculus GN=Ppil4 PE=2 SV=2 - [PPIL4_MOUSE]                        | 0 | 1            | 0 | 2            | 0 | 1   | 0 | 4                | N/A    | 1.61E-02 | 57.2 (7)(16)          |  |
| 229           | Q9QZ23      | NFU1 iron-sulfur cluster scaffold homolog, mitochondrial OS=Mus musculus GN=Nfu1 PE=1 SV=2 - [NFU1_MOUSE]            | 0 | 1            | 0 | 2            | 0 | 1   | 0 | 4                | N/A    | 1.61E-02 | 28.5 (7)(16)          |  |
| 230           | Q61249      | Immunoglobulin-binding protein 1 OS=Mus musculus GN=Igbp1 PE=1 SV=1 - [IGBP1_MOUSE]                                  | 0 | 2            | 0 | 1            | 0 | 1   | 0 | 4                | N/A    | 1.61E-02 | 38.9 (7)(16)          |  |
| 231           | Q8BFY6      | Peflin OS=Mus musculus GN=Pef1 PE=2 SV=1 - [PEF1_MOUSE]                                                              | 0 | 2            | 0 | 1            | 0 | 1   | 0 | 4                | N/A    | 1.61E-02 | 29.2 (7)(16)(20)      |  |
| 232           | Q91X11-2    | Isoform 2 of tRNA-dihydrouridine(47) synthase [NAD(P)(+)]-like OS=Mus musculus GN=Dus3l - [DUS3L_MOUSE]              | 0 | 1            | 0 | 2            | 0 | 1   | 0 | 4                | N/A    | 1.61E-02 | 46.7 (7)(20)          |  |
| 233           | Q04857      | Collagen alpha-1(VI) chain OS=Mus musculus GN=Col6a1 PE=2 SV=1 - [CO6A1_MOUSE]                                       | 0 | 1            | 0 | 1            | 0 | 2   | 0 | 4                | N/A    | 1.61E-02 | 108.4                 |  |
| 234           | Q3V0C1-3    | Isoform 3 of Zinc finger matrin-type protein 1 OS=Mus musculus GN=Zmat1 - [ZMAT1_MOUSE]                              | 0 | 1            | 0 | 1            | 0 | 2   | 0 | 4                | N/A    | 1.61E-02 | 56.6                  |  |
| 235           | Q99KW3-1    | Isoform 1 of TRIO and F-actin-binding protein OS=Mus musculus GN=Triobp - [TARA_MOUSE]                               | 0 | 1            | 0 | 1            | 0 | 2   | 0 | 4                | N/A    | 1.61E-02 | 66.9                  |  |
| 236           | Q9D727      | Uncharacterized protein C6orf226 homolog OS=Mus musculus PE=2 SV=1 - [CF226_MOUSE]                                   | 0 | 1            | 0 | 1            | 0 | 2   | 0 | 4                | N/A    | 1.61E-02 | 12                    |  |
| 237           | P38060      | Hydroxymethylglutaryl-CoA lyase, mitochondrial OS=Mus musculus GN=Hmgcl PE=1 SV=2 - [HMGCL_MOUSE]                    | 0 | 1            | 0 | 2            | 0 | 1   | 0 | 4                | N/A    | 1.61E-02 | 34.2                  |  |
| 238           | Q3TBW2      | 39S ribosomal protein L10, mitochondrial OS=Mus musculus GN=Mrpl10 PE=2 SV=2 - [RM10_MOUSE]                          | 0 | 1            | 0 | 2            | 0 | 1   | 0 | 4                | N/A    | 1.61E-02 | 29.4                  |  |
| 239           | Q58A65-2    | Isoform 2 of C-Jun-amino-terminal kinase-interacting protein 4 OS=Mus musculus GN=Spag9 - [JIP4_MOUSE]               | 0 | 1            | 0 | 2            | 0 | 1   | 0 | 4                | N/A    | 1.61E-02 | 144.6                 |  |
| 240           | Q6PFD6      | Kinesin-like protein KIF18B OS=Mus musculus GN=Kif18b PE=2 SV=2 - [KI18B_MOUSE]                                      | 0 | 1            | 0 | 2            | 0 | 1   | 0 | 4                | N/A    | 1.61E-02 | 91.9                  |  |
| 241           | Q8BLN5      | Lanosterol synthase OS=Mus musculus GN=Lss PE=2 SV=2 - [ERG7_MOUSE]                                                  | 0 | 1            | 0 | 2            | 0 | 1   | 0 | 4                | N/A    | 1.61E-02 | 83.1                  |  |
| 242           | Q8CGA0      | Protein phosphatase 1F OS=Mus musculus GN=Ppm1f PE=2 SV=1 - [PPM1F_MOUSE]                                            | 0 | 1            | 0 | 2            | 0 | 1   | 0 | 4                | N/A    | 1.61E-02 | 49.6                  |  |
| 243           | Q8K1J5      | Protein SDE2 homolog OS=Mus musculus GN=Sde2 PE=1 SV=1 - [SDE2_MOUSE]                                                | 0 | 1            | 0 | 2            | 0 | 1   | 0 | 4                | N/A    | 1.61E-02 | 48.5                  |  |
| 244           | Q9CWX8-2    | Isoform 2 of NADH dehydrogenase [ubiquinone] complex I, assembly factor 7 OS=Mus musculus GN=Ndufaf7 - [NDUF7_MOUSE] | 0 | 1            | 0 | 2            | 0 | 1   | 0 | 4                | N/A    | 1.61E-02 | 42.5                  |  |
| 245           | Q99JX7      | Nuclear RNA export factor 1 OS=Mus musculus GN=Nxf1 PE=1 SV=3 - [NXF1_MOUSE]                                         | 0 | 2            | 0 | 1            | 0 | 1   | 0 | 4                | N/A    | 1.61E-02 | 70.3                  |  |

|     |           | 2AzGlcNAc                                                                                                                |  |                  |  |                  |  |     |  |                     |        |             |                       |   |    |   |    |   |     |       |          |       |                     |
|-----|-----------|--------------------------------------------------------------------------------------------------------------------------|--|------------------|--|------------------|--|-----|--|---------------------|--------|-------------|-----------------------|---|----|---|----|---|-----|-------|----------|-------|---------------------|
|     |           | Spectral Counts                                                                                                          |  |                  |  |                  |  |     |  |                     |        |             |                       |   |    |   |    |   |     |       |          |       |                     |
|     |           | Experimen<br>t 1                                                                                                         |  | Experime<br>nt 2 |  | Experime<br>nt 3 |  | Sum |  | Enrichment<br>Ratio | T-Test | MW<br>[kDa] | Previously Identified |   |    |   |    |   |     |       |          |       |                     |
| No. | Accession | Description                                                                                                              |  |                  |  |                  |  |     |  |                     |        |             |                       |   |    |   |    |   |     |       |          |       |                     |
| 246 | H3BKW0    | Cleavage and polyadenylation-specificity factor subunit 6 (Fragment) OS=Mus musculus GN=Cpsf6 PE=4 SV=1 - [H3BKW0_MOUSE] |  |                  |  |                  |  |     |  |                     |        | 0           | 2                     | 0 | 1  | 0 | 1  | 0 | 4   | N/A   | 1.61E-02 | 21.2  |                     |
| 247 | Q3UPH7-3  | Isoform 3 of Rho guanine nucleotide exchange factor 40 OS=Mus musculus GN=Arhgef40 - [ARH40_MOUSE]                       |  |                  |  |                  |  |     |  |                     |        | 0           | 2                     | 0 | 1  | 0 | 1  | 0 | 4   | N/A   | 1.61E-02 | 160.1 |                     |
| 248 | Q6P5E4    | UDP-glucose:glycoprotein glucosyltransferase 1 OS=Mus musculus GN=Uggt1 PE=1 SV=4 - [UGGG1_MOUSE]                        |  |                  |  |                  |  |     |  |                     |        | 0           | 2                     | 0 | 1  | 0 | 1  | 0 | 4   | N/A   | 1.61E-02 | 176.3 |                     |
| 249 | Q8R570    | Synaptosomal-associated protein 47 OS=Mus musculus GN=Snap47 PE=1 SV=1 - [SNP47_MOUSE]                                   |  |                  |  |                  |  |     |  |                     |        | 0           | 2                     | 0 | 1  | 0 | 1  | 0 | 4   | N/A   | 1.61E-02 | 46.5  |                     |
| 250 | Q9ES97-3  | Isoform 3 of Reticulon-3 OS=Mus musculus GN=Rtn3 - [RTN3_MOUSE]                                                          |  |                  |  |                  |  |     |  |                     |        | 0           | 1                     | 0 | 1  | 0 | 1  | 0 | 3   | N/A   | 0.00E+00 | 25.4  | (1)(13)(19)         |
| 251 | Q80UY2-2  | Isoform 2 of E3 ubiquitin-protein ligase KCMF1 OS=Mus musculus GN=Kcmf1 - [KCMF1_MOUSE]                                  |  |                  |  |                  |  |     |  |                     |        | 0           | 1                     | 0 | 1  | 0 | 1  | 0 | 3   | N/A   | 0.00E+00 | 32.1  | (1)(7)(16)          |
| 252 | Q7TNE3    | Sperm-associated antigen 7 OS=Mus musculus GN=Spag7 PE=1 SV=1 - [SPAG7_MOUSE]                                            |  |                  |  |                  |  |     |  |                     |        | 0           | 1                     | 0 | 1  | 0 | 1  | 0 | 3   | N/A   | 0.00E+00 | 25.9  | (1)(7)(16)(19)      |
| 253 | P07607    | Thymidylate synthase OS=Mus musculus GN=Tyms PE=1 SV=1 - [TYSY_MOUSE]                                                    |  |                  |  |                  |  |     |  |                     |        | 0           | 1                     | 0 | 1  | 0 | 1  | 0 | 3   | N/A   | 0.00E+00 | 34.9  | (11)                |
| 254 | Q3UI43    | BRISC and BRCA1-A complex member 1 OS=Mus musculus GN=Babam1 PE=2 SV=1 - [BABA1_MOUSE]                                   |  |                  |  |                  |  |     |  |                     |        | 0           | 1                     | 0 | 1  | 0 | 1  | 0 | 3   | N/A   | 0.00E+00 | 36.8  | (16)                |
| 255 | Q8K1C0-4  | Isoform 4 of Protein angel homolog 2 OS=Mus musculus GN=Angel2 - [ANGE2_MOUSE]                                           |  |                  |  |                  |  |     |  |                     |        | 0           | 1                     | 0 | 1  | 0 | 1  | 0 | 3   | N/A   | 0.00E+00 | 24.1  | (16)                |
| 256 | Q922D4-4  | Isoform 4 of Serine/threonine-protein phosphatase 6 regulatory subunit 3 OS=Mus musculus GN=Ppp6r3 - [PP6R3_MOUSE]       |  |                  |  |                  |  |     |  |                     |        | 0           | 1                     | 0 | 1  | 0 | 1  | 0 | 3   | N/A   | 0.00E+00 | 56.7  | (16)                |
| 257 | Q6PDL0    | Cytoplasmic dynein 1 light intermediate chain 2 OS=Mus musculus GN=Dync1li2 PE=1 SV=2 - [DC1L2_MOUSE]                    |  |                  |  |                  |  |     |  |                     |        | 0           | 1                     | 0 | 1  | 0 | 1  | 0 | 3   | N/A   | 0.00E+00 | 54.2  | (16)(18)(20)        |
| 258 | Q8BQ30    | Phostensin OS=Mus musculus GN=Ppp1r18 PE=1 SV=1 - [PPR18_MOUSE]                                                          |  |                  |  |                  |  |     |  |                     |        | 0           | 1                     | 0 | 1  | 0 | 1  | 0 | 3   | N/A   | 0.00E+00 | 65.6  | (16)(20)            |
| 259 | E9Q5L7    | PHD finger protein 10 OS=Mus musculus GN=Phf10 PE=4 SV=2 - [E9Q5L7_MOUSE]                                                |  |                  |  |                  |  |     |  |                     |        | 0           | 1                     | 0 | 1  | 0 | 1  | 0 | 3   | N/A   | 0.00E+00 | 26.9  | (20)                |
| 260 | P39053-3  | Isoform 3 of Dynam-1 OS=Mus musculus GN=Dnm1 - [DYN1_MOUSE]                                                              |  |                  |  |                  |  |     |  |                     |        | 0           | 1                     | 0 | 1  | 0 | 1  | 0 | 3   | N/A   | 0.00E+00 | 95.9  | (4)                 |
| 261 | Q8VCF0    | Mitochondrial antiviral-signaling protein OS=Mus musculus GN=Mavs PE=1 SV=1 - [MAVS_MOUSE]                               |  |                  |  |                  |  |     |  |                     |        | 0           | 1                     | 0 | 1  | 0 | 1  | 0 | 3   | N/A   | 0.00E+00 | 53.4  | (4)(7)(13)(16)(20)  |
| 262 | Q91YN9    | BAG family molecular chaperone regulator 2 OS=Mus musculus GN=Bag2 PE=1 SV=1 - [BAG2_MOUSE]                              |  |                  |  |                  |  |     |  |                     |        | 0           | 1                     | 0 | 1  | 0 | 1  | 0 | 3   | N/A   | 0.00E+00 | 23.5  | (7)                 |
| 263 | Q9CPP0    | Nucleoplasmin-3 OS=Mus musculus GN=Npm3 PE=2 SV=3 - [NPM3_MOUSE]                                                         |  |                  |  |                  |  |     |  |                     |        | 0           | 1                     | 0 | 1  | 0 | 1  | 0 | 3   | N/A   | 0.00E+00 | 19    | (7)(12)(16)(19)(20) |
| 264 | P20108    | Thioredoxin-dependent peroxide reductase, mitochondrial OS=Mus musculus GN=Prdx3 PE=1 SV=1 - [PRDX3_MOUSE]               |  |                  |  |                  |  |     |  |                     |        | 0           | 1                     | 0 | 1  | 0 | 1  | 0 | 3   | N/A   | 0.00E+00 | 28.1  | (7)(16)             |
| 265 | Q00547-2  | Isoform RHAMM1 of Hyaluronan mediated motility receptor OS=Mus musculus GN=Hmnr - [HMMR_MOUSE]                           |  |                  |  |                  |  |     |  |                     |        | 0           | 1                     | 0 | 1  | 0 | 1  | 0 | 3   | N/A   | 0.00E+00 | 88.8  | (7)(16)             |
| 266 | P46062    | Signal-induced proliferation-associated protein 1 OS=Mus musculus GN=Sipa1 PE=2 SV=2 - [SIPA1_MOUSE]                     |  |                  |  |                  |  |     |  |                     |        | 0           | 1                     | 0 | 1  | 0 | 1  | 0 | 3   | N/A   | 0.00E+00 | 112   |                     |
| 267 | Q8BYJ6-4  | Isoform 4 of TBC1 domain family member 4 OS=Mus musculus GN=Tbc1d4 - [TBCD4_MOUSE]                                       |  |                  |  |                  |  |     |  |                     |        | 0           | 1                     | 0 | 1  | 0 | 1  | 0 | 3   | N/A   | 0.00E+00 | 89.7  |                     |
| 268 | B7ZC19    | GPI transamidase component PIG-T OS=Mus musculus GN=Pigt PE=4 SV=1 - [B7ZC19_MOUSE]                                      |  |                  |  |                  |  |     |  |                     |        | 0           | 1                     | 0 | 1  | 0 | 1  | 0 | 3   | N/A   | 0.00E+00 | 49.1  |                     |
| 269 | G3UYZ0    | Large proline-rich protein BAG6 (Fragment) OS=Mus musculus GN=Bag6 PE=4 SV=1 - [G3UYZ0_MOUSE]                            |  |                  |  |                  |  |     |  |                     |        | 0           | 1                     | 0 | 1  | 0 | 1  | 0 | 3   | N/A   | 0.00E+00 | 22.4  |                     |
| 270 | P35831    | Tyrosine-protein phosphatase non-receptor type 12 OS=Mus musculus GN=Ptpn12 PE=1 SV=3 - [PTN12_MOUSE]                    |  |                  |  |                  |  |     |  |                     |        | 0           | 1                     | 0 | 1  | 0 | 1  | 0 | 3   | N/A   | 0.00E+00 | 86.5  |                     |
| 271 | P48755    | Fos-related antigen 1 OS=Mus musculus GN=Fosl1 PE=2 SV=2 - [FOSL1_MOUSE]                                                 |  |                  |  |                  |  |     |  |                     |        | 0           | 1                     | 0 | 1  | 0 | 1  | 0 | 3   | N/A   | 0.00E+00 | 29.8  |                     |
| 272 | Q61850    | Forkhead box protein C2 OS=Mus musculus GN=Foxc2 PE=2 SV=2 - [FOXC2_MOUSE]                                               |  |                  |  |                  |  |     |  |                     |        | 0           | 1                     | 0 | 1  | 0 | 1  | 0 | 3   | N/A   | 0.00E+00 | 52.8  |                     |
| 273 | Q9CQ36    | DNA polymerase epsilon subunit 4 OS=Mus musculus GN=Pole4 PE=2 SV=1 - [DPOE4_MOUSE]                                      |  |                  |  |                  |  |     |  |                     |        | 0           | 1                     | 0 | 1  | 0 | 1  | 0 | 3   | N/A   | 0.00E+00 | 12.2  |                     |
| 274 | Q9CQ86    | Migration and invasion enhancer 1 OS=Mus musculus GN=Mien1 PE=1 SV=1 - [MIEN1_MOUSE]                                     |  |                  |  |                  |  |     |  |                     |        | 0           | 1                     | 0 | 1  | 0 | 1  | 0 | 3   | N/A   | 0.00E+00 | 12.3  |                     |
| 275 | Q9D2E2-2  | Isoform 2 of Target of EGR1 protein 1 OS=Mus musculus GN=Toe1 - [TOE1_MOUSE]                                             |  |                  |  |                  |  |     |  |                     |        | 0           | 1                     | 0 | 1  | 0 | 1  | 0 | 3   | N/A   | 0.00E+00 | 37.1  |                     |
| 276 | Q9JLJ8    | Serine--tRNA ligase, mitochondrial OS=Mus musculus GN=Sars2 PE=2 SV=2 - [SYSM_MOUSE]                                     |  |                  |  |                  |  |     |  |                     |        | 0           | 1                     | 0 | 1  | 0 | 1  | 0 | 3   | N/A   | 0.00E+00 | 58.3  |                     |
| 277 | Q9Z0F6    | Cell cycle checkpoint control protein RAD9A OS=Mus musculus GN=Rad9a PE=1 SV=1 - [RAD9A_MOUSE]                           |  |                  |  |                  |  |     |  |                     |        | 0           | 1                     | 0 | 1  | 0 | 1  | 0 | 3   | N/A   | 0.00E+00 | 42    |                     |
| 278 | Q9Z2E1    | Methyl-CpG-binding domain protein 2 OS=Mus musculus GN=Mbd2 PE=2 SV=2 - [MBD2_MOUSE]                                     |  |                  |  |                  |  |     |  |                     |        | 0           | 1                     | 0 | 1  | 0 | 1  | 0 | 3   | N/A   | 0.00E+00 | 43.5  |                     |
| 279 | Q3THK7    | GMP synthase [glutamine-hydrolyzing] OS=Mus musculus GN=Gmps PE=1 SV=2 - [GUAA_MOUSE]                                    |  |                  |  |                  |  |     |  |                     |        | 1           | 21                    | 0 | 25 | 0 | 15 | 1 | 61  | 61.00 | 2.39E-03 | 76.7  | (19)(20)            |
| 280 | Q8BK67    | Protein RCC2 OS=Mus musculus GN=Rcc2 PE=2 SV=1 - [RCC2_MOUSE]                                                            |  |                  |  |                  |  |     |  |                     |        | 1           | 12                    | 0 | 12 | 0 | 12 | 1 | 36  | 36.00 | 3.98E-06 | 55.9  | (7)(20)             |
| 281 | P70372    | ELAV-like protein 1 OS=Mus musculus GN=Elavl1 PE=1 SV=2 - [ELAV1_MOUSE]                                                  |  |                  |  |                  |  |     |  |                     |        | 0           | 8                     | 1 | 13 | 0 | 11 | 1 | 32  | 32.00 | 2.27E-03 | 36.1  | (12)(19)(20)        |
| 282 | Q80VB6    | Dcl1 protein OS=Mus musculus GN=Dcl1 PE=2 SV=1 - [Q80VB6_MOUSE]                                                          |  |                  |  |                  |  |     |  |                     |        | 0           | 9                     | 0 | 13 | 1 | 8  | 1 | 30  | 30.00 | 3.48E-03 | 40.4  |                     |
| 283 | P23198    | Chromobox protein homolog 3 OS=Mus musculus GN=Cbx3 PE=1 SV=2 - [CBX3_MOUSE]                                             |  |                  |  |                  |  |     |  |                     |        | 1           | 7                     | 0 | 14 | 0 | 8  | 1 | 29  | 29.00 | 1.35E-02 | 20.8  | (7)(19)(20)         |
| 284 | A2AMW0    | Capping protein (Actin filament) muscle Z-line, beta OS=Mus musculus GN=Capzb PE=4 SV=1 - [A2AMW0_MOUSE]                 |  |                  |  |                  |  |     |  |                     |        | 1           | 9                     | 0 | 11 | 0 | 8  | 1 | 28  | 28.00 | 6.73E-04 | 29.3  | (4)(19)(20)         |
| 285 | Q9DAW9    | Calponin-3 OS=Mus musculus GN=Cnn3 PE=2 SV=1 - [CNN3_MOUSE]                                                              |  |                  |  |                  |  |     |  |                     |        | 1           | 10                    | 0 | 8  | 0 | 8  | 1 | 26  | 26.00 | 3.64E-04 | 36.4  | (7)(20)             |
| 286 | P97452    | Ribosome biogenesis protein BOP1 OS=Mus musculus GN=Bop1 PE=1 SV=1 - [BOP1_MOUSE]                                        |  |                  |  |                  |  |     |  |                     |        | 0           | 9                     | 1 | 7  | 0 | 9  | 1 | 25  | 25.00 | 4.27E-04 | 82.5  | (7)(16)(20)         |
| 287 | Q64521    | Glycerol-3-phosphate dehydrogenase, mitochondrial OS=Mus musculus GN=Gpd2 PE=1 SV=2 - [GPD2_MOUSE]                       |  |                  |  |                  |  |     |  |                     |        | 1           | 7                     | 0 | 6  | 0 | 11 | 1 | 24  | 24.00 | 8.02E-03 | 80.9  |                     |
| 288 | O55137    | Acyl-coenzyme A thioesterase 1 OS=Mus musculus GN=Acot1 PE=1 SV=1 - [ACOT1_MOUSE]                                        |  |                  |  |                  |  |     |  |                     |        | 1           | 7                     | 0 | 8  | 0 | 8  | 1 | 23  | 23.00 | 9.97E-05 | 46.1  | (20)                |
| 289 | Q08093    | Calponin-2 OS=Mus musculus GN=Cnn2 PE=2 SV=1 - [CNN2_MOUSE]                                                              |  |                  |  |                  |  |     |  |                     |        | 1           | 7                     | 0 | 5  | 0 | 5  | 1 | 17  | 17.00 | 2.02E-03 | 33.1  | (7)(19)(20)         |
| 290 | J3QPE8    | MCG16555 OS=Mus musculus GN=Vdac3-ps1 PE=4 SV=1 - [J3QPE8_MOUSE]                                                         |  |                  |  |                  |  |     |  |                     |        | 0           | 11                    | 0 | 12 | 2 | 10 | 2 | 33  | 16.50 | 3.03E-04 | 30.7  | (20)                |
| 291 | Q60598    | Src substrate cortactin OS=Mus musculus GN=Cttn PE=1 SV=2 - [SRC8_MOUSE]                                                 |  |                  |  |                  |  |     |  |                     |        | 2           | 10                    | 0 | 8  | 0 | 10 | 2 | 28  | 14.00 | 7.78E-04 | 61.2  | (13)(19)(20)        |
| 292 | P47791-2  | Isoform Cytoplasmic of Glutathione reductase, mitochondrial OS=Mus musculus GN=Gsr - [GSHR_MOUSE]                        |  |                  |  |                  |  |     |  |                     |        | 0           | 5                     | 1 | 3  | 0 | 6  | 1 | 14  | 14.00 | 1.01E-02 | 51    | (16)                |
| 293 | J3QNB1    | La-related protein 1 OS=Mus musculus GN=Larp1 PE=4 SV=1 - [J3QNB1_MOUSE]                                                 |  |                  |  |                  |  |     |  |                     |        | 0           | 5                     | 0 | 5  | 1 | 4  | 1 | 14  | 14.00 | 7.78E-04 | 121   | (7)(16)(19)(20)     |
| 294 | Q8C650-2  | Isoform 2 of Septin-10 OS=Mus musculus GN=Sept10 - [SEP10_MOUSE]                                                         |  |                  |  |                  |  |     |  |                     |        | 0           | 5                     | 1 | 4  | 0 | 5  | 1 | 14  | 14.00 | 7.78E-04 | 49.8  |                     |
| 295 | O54931-2  | Isoform 2 of A-kinase anchor protein 2 OS=Mus musculus GN=Akap2 - [AKAP2_MOUSE]                                          |  |                  |  |                  |  |     |  |                     |        | 2           | 20                    | 1 | 13 | 1 | 19 | 4 | 52  | 13.00 | 1.94E-03 | 97.1  | (7)(16)(19)(20)     |
| 296 | O70551    | SRF protein kinase 1 OS=Mus musculus GN=Srp1 PE=1 SV=2 - [SRPK1_MOUSE]                                                   |  |                  |  |                  |  |     |  |                     |        | 0           | 8                     | 1 | 9  | 1 | 8  | 2 | 25  | 12.50 | 8.36E-05 | 73    | (7)(20)             |
| 297 | P16045    | Galectin-1 OS=Mus musculus GN=Lgals1 PE=1 SV=3 - [LEG1_MOUSE]                                                            |  |                  |  |                  |  |     |  |                     |        | 3           | 34                    | 3 | 41 | 3 | 37 | 9 | 112 | 12.44 | 7.13E-05 | 14.9  | (16)(20)            |
| 298 | Q9D819    | Inorganic pyrophosphatase OS=Mus musculus GN=Ppa1 PE=1 SV=1 - [IPYR_MOUSE]                                               |  |                  |  |                  |  |     |  |                     |        | 0           | 9                     | 0 | 10 | 2 | 5  | 2 | 24  | 12.00 | 1.17E-02 | 32.6  | (16)(19)(20)        |

|               |                                                                                                                                 | 2AzGlcNAc        |     |                  |     |                  |     |     |     |                     |          |             |                                  |  |  |  |  |
|---------------|---------------------------------------------------------------------------------------------------------------------------------|------------------|-----|------------------|-----|------------------|-----|-----|-----|---------------------|----------|-------------|----------------------------------|--|--|--|--|
|               |                                                                                                                                 | Spectral Counts  |     |                  |     |                  |     |     |     |                     |          |             |                                  |  |  |  |  |
|               |                                                                                                                                 | Experimen<br>t 1 |     | Experime<br>nt 2 |     | Experime<br>nt 3 |     | Sum |     |                     |          |             |                                  |  |  |  |  |
| Accessio<br>n | Description                                                                                                                     | -                | +   | -                | +   | -                | +   | -   | +   | Enrichment<br>Ratio | T-Test   | MW<br>[kDa] | Previously Identified            |  |  |  |  |
| 299           | Q8BFS6 Calcineurin-like phosphoesterase domain-containing protein 1 OS=Mus musculus GN=Cpped1 PE=2 SV=1 - [CPED_MOUSE]          | 1                | 2   | 0                | 6   | 0                | 4   | 1   | 12  | 12.00               | 3.80E-02 | 35.2        | (16)(20)                         |  |  |  |  |
| 300           | Q61206 Platelet-activating factor acetylhydrolase IB subunit beta OS=Mus musculus GN=Pafah1b2 PE=1 SV=2 - [PA1B2_MOUSE]         | 0                | 4   | 0                | 4   | 1                | 4   | 1   | 12  | 12.00               | 3.88E-04 | 25.6        |                                  |  |  |  |  |
| 301           | P50516 V-type proton ATPase catalytic subunit A OS=Mus musculus GN=Atpv1a PE=1 SV=2 - [VATA_MOUSE]                              | 2                | 9   | 0                | 9   | 0                | 5   | 2   | 23  | 11.50               | 9.34E-03 | 68.3        | (4)(16)                          |  |  |  |  |
| 302           | Q8BGJ5 MCG13402, isoform CRA_a OS=Mus musculus GN=Ptbp1 PE=2 SV=1 - [Q8BGJ5_MOUSE]                                              | 0                | 15  | 2                | 13  | 2                | 15  | 4   | 43  | 10.75               | 1.60E-04 | 56.9        | (19)(20)                         |  |  |  |  |
| 303           | Q8BH80 Vesicle-associated membrane protein, associated protein B and C OS=Mus musculus GN=Vapb PE=2 SV=1 - [Q8BH80_MOUSE]       | 1                | 2   | 0                | 5   | 0                | 3   | 1   | 10  | 10.00               | 3.35E-02 | 26.9        | (20)                             |  |  |  |  |
| 304           | Q5PSV9 Mediator of DNA damage checkpoint protein 1 OS=Mus musculus GN=Mdc1 PE=1 SV=1 - [MDC1_MOUSE]                             | 0                | 3   | 0                | 4   | 1                | 3   | 1   | 10  | 10.00               | 3.13E-03 | 184.6       | (7)(10)(16)(20)                  |  |  |  |  |
| 305           | Q8BT18 Serine/arginine repetitive matrix protein 2 OS=Mus musculus GN=Srrm2 PE=1 SV=3 - [SRRM2_MOUSE]                           | 1                | 3   | 0                | 2   | 0                | 5   | 1   | 10  | 10.00               | 3.35E-02 | 294.7       | (7)(16)(20)                      |  |  |  |  |
| 306           | P40124 Adenyl cyclase-associated protein 1 OS=Mus musculus GN=Cap1 PE=1 SV=4 - [CAP1_MOUSE]                                     | 3                | 23  | 2                | 21  | 2                | 23  | 7   | 67  | 9.57                | 1.15E-05 | 51.5        | (7)(19)(20)                      |  |  |  |  |
| 307           | P07742 Ribonucleoside-diphosphate reductase large subunit OS=Mus musculus GN=Rrm1 PE=1 SV=2 - [R1R1_MOUSE]                      | 3                | 23  | 3                | 20  | 1                | 23  | 7   | 66  | 9.43                | 8.16E-05 | 90.2        | (10)(16)(19)(20)                 |  |  |  |  |
| 308           | P30285 Cyclin-dependent kinase 4 OS=Mus musculus GN=Cdk4 PE=1 SV=1 - [CDK4_MOUSE]                                               | 1                | 5   | 0                | 7   | 1                | 6   | 2   | 18  | 9.00                | 1.32E-03 | 33.7        | (7)(19)                          |  |  |  |  |
| 309           | P35922-9 Isoform ISO9 of Fragile X mental retardation protein 1 homolog OS=Mus musculus GN=Fmr1 - [FMR1_MOUSE]                  | 0                | 2   | 0                | 4   | 1                | 3   | 1   | 9   | 9.00                | 1.61E-02 | 64.1        | (7)(16)                          |  |  |  |  |
| 310           | Q9WV55 Vesicle-associated membrane protein-associated protein A OS=Mus musculus GN=Vapa PE=1 SV=2 - [VAPA_MOUSE]                | 1                | 5   | 1                | 5   | 0                | 7   | 2   | 17  | 8.50                | 2.57E-03 | 27.8        | (19)(20)                         |  |  |  |  |
| 311           | A2A6U3 Septin 9 OS=Mus musculus GN=Sept9 PE=3 SV=1 - [A2A6U3_MOUSE]                                                             | 2                | 8   | 1                | 11  | 1                | 14  | 4   | 33  | 8.25                | 5.40E-03 | 63.7        | (19)(20)                         |  |  |  |  |
| 312           | O89110 Caspase-8 OS=Mus musculus GN=Casp8 PE=1 SV=1 - [CASP8_MOUSE]                                                             | 0                | 3   | 0                | 3   | 1                | 2   | 1   | 8   | 8.00                | 7.76E-03 | 55.3        | (20)                             |  |  |  |  |
| 313           | O35286 Putative pre-mRNA-splicing factor ATP-dependent RNA helicase DHX15 OS=Mus musculus GN=Dhx15 PE=2 SV=2 - [DHX15_MOUSE]    | 0                | 11  | 2                | 8   | 2                | 10  | 4   | 29  | 7.25                | 1.66E-03 | 90.9        | (7)(10)(16)(19)(20)              |  |  |  |  |
| 314           | D3YWF6 Ubiquitin thioesterase OTUB1 OS=Mus musculus GN=Otub1 PE=4 SV=1 - [D3YWF6_MOUSE]                                         | 1                | 9   | 0                | 11  | 3                | 9   | 4   | 29  | 7.25                | 1.66E-03 | 28          |                                  |  |  |  |  |
| 315           | Q9ERG0 LIM domain and actin-binding protein 1 OS=Mus musculus GN=Lima1 PE=1 SV=3 - [LIMA1_MOUSE]                                | 3                | 18  | 2                | 14  | 2                | 18  | 7   | 50  | 7.14                | 4.78E-04 | 84          | (7)(16)(19)(20)                  |  |  |  |  |
| 316           | Q9R0Q7 Prostaglandin E synthase 3 OS=Mus musculus GN=Ptges3 PE=1 SV=1 - [TEBP_MOUSE]                                            | 0                | 2   | 1                | 2   | 0                | 3   | 1   | 7   | 7.00                | 1.32E-02 | 18.7        | (19)                             |  |  |  |  |
| 317           | Q61699-2 Isoform HSP105-beta of Heat shock protein 105 kDa OS=Mus musculus GN=Hsph1 - [HS105_MOUSE]                             | 3                | 23  | 4                | 23  | 3                | 20  | 10  | 66  | 6.60                | 5.97E-05 | 91.6        | (4)(16)(20)                      |  |  |  |  |
| 318           | P30681 High mobility group protein B2 OS=Mus musculus GN=Hmgb2 PE=1 SV=3 - [HMGB2_MOUSE]                                        | 0                | 4   | 1                | 5   | 1                | 4   | 2   | 13  | 6.50                | 1.47E-03 | 24.1        | (7)(16)(19)(20)                  |  |  |  |  |
| 319           | Q6DFW4 Nucleolar protein 58 OS=Mus musculus GN=Nop58 PE=1 SV=1 - [NOP58_MOUSE]                                                  | 1                | 14  | 4                | 18  | 2                | 12  | 7   | 44  | 6.29                | 3.33E-03 | 60.3        | (7)(16)(19)(20)                  |  |  |  |  |
| 320           | Q9R0X4 Acyl-coenzyme A thioesterase 9, mitochondrial OS=Mus musculus GN=Acot9 PE=1 SV=1 - [ACOT9_MOUSE]                         | 1                | 6   | 3                | 8   | 0                | 10  | 4   | 24  | 6.00                | 1.01E-02 | 50.5        | (20)                             |  |  |  |  |
| 321           | O55135 Eukaryotic translation initiation factor 6 OS=Mus musculus GN=EIF6 PE=1 SV=2 - [IF6_MOUSE]                               | 2                | 7   | 1                | 5   | 0                | 5   | 3   | 17  | 5.67                | 6.12E-03 | 26.5        | (16)                             |  |  |  |  |
| 322           | G3UX26 Voltage-dependent anion-selective channel protein 2 (Fragment) OS=Mus musculus GN=Vdac2 PE=4 SV=1 - [G3UX26_MOUSE]       | 4                | 32  | 7                | 30  | 5                | 28  | 16  | 90  | 5.63                | 7.06E-05 | 30.4        | (20)                             |  |  |  |  |
| 323           | P16858 Glyceraldehyde-3-phosphate dehydrogenase OS=Mus musculus GN=Gapdh PE=1 SV=2 - [G3P_MOUSE]                                | 22               | 113 | 19               | 111 | 18               | 105 | 59  | 329 | 5.58                | 4.74E-06 | 35.8        | (1)(2)(3)(6)(16)(17)(18)(19)(20) |  |  |  |  |
| 324           | Q6A0A9 Constitutive coactivator of PPAR-gamma-like protein 1 OS=Mus musculus GN=FAM120A PE=1 SV=2 - [F120A_MOUSE]               | 0                | 4   | 0                | 3   | 2                | 4   | 2   | 11  | 5.50                | 1.58E-02 | 121.6       | (16)                             |  |  |  |  |
| 325           | Q7TMK9-2 Isoform 2 of Heterogeneous nuclear ribonucleoprotein Q OS=Mus musculus GN=Syncrip - [HNRPO_MOUSE]                      | 2                | 5   | 3                | 12  | 0                | 10  | 5   | 27  | 5.40                | 3.16E-02 | 62.6        | (12)(19)                         |  |  |  |  |
| 326           | Q9CQN1 Heat shock protein 75 kDa, mitochondrial OS=Mus musculus GN=Trap1 PE=1 SV=1 - [TRAP1_MOUSE]                              | 2                | 3   | 0                | 4   | 0                | 3   | 2   | 10  | 5.00                | 2.32E-02 | 80.2        | (7)(16)                          |  |  |  |  |
| 327           | E9Q1P8 Interferon regulatory factor 2-binding protein 2 OS=Mus musculus GN=Irf2bp2 PE=1 SV=1 - [I2BP2_MOUSE]                    | 0                | 2   | 0                | 2   | 1                | 1   | 1   | 5   | 5.00                | 4.74E-02 | 59.3        | (16)                             |  |  |  |  |
| 328           | Q9WTX5 S-phase kinase-associated protein 1 OS=Mus musculus GN=Skp1 PE=1 SV=3 - [SKP1_MOUSE]                                     | 0                | 2   | 0                | 2   | 1                | 1   | 1   | 5   | 5.00                | 4.74E-02 | 18.7        | (7)(16)(20)                      |  |  |  |  |
| 329           | Q9WU78 Programmed cell death 6-interacting protein OS=Mus musculus GN=Pdc6ip PE=1 SV=3 - [PDC6I_MOUSE]                          | 2                | 17  | 6                | 11  | 1                | 16  | 9   | 44  | 4.89                | 8.32E-03 | 96          | (20)                             |  |  |  |  |
| 330           | A2AL12 Heterogeneous nuclear ribonucleoprotein A3 OS=Mus musculus GN=Hnrnpa3 PE=4 SV=1 - [A2AL12_MOUSE]                         | 3                | 20  | 5                | 22  | 4                | 16  | 12  | 58  | 4.83                | 1.17E-03 | 34.5        | (4)(19)(20)                      |  |  |  |  |
| 331           | Q8R050-2 Isoform 2 of Eukaryotic peptide chain release factor GTP-binding subunit ERF3A OS=Mus musculus GN=Gsp1 - [ERF3A_MOUSE] | 0                | 7   | 3                | 6   | 1                | 6   | 4   | 19  | 4.75                | 6.07E-03 | 68.5        | (16)(19)(20)                     |  |  |  |  |
| 332           | Q60967 Bifunctional 3'-phosphoadenosine 5'-phosphosulfate synthase 1 OS=Mus musculus GN=Paps1 PE=2 SV=1 - [PAPS1_MOUSE]         | 3                | 11  | 2                | 9   | 1                | 8   | 6   | 28  | 4.67                | 2.24E-03 | 70.7        | (20)                             |  |  |  |  |
| 333           | P60335 Poly(rC)-binding protein 1 OS=Mus musculus GN=Pcbp1 PE=1 SV=1 - [PCBP1_MOUSE]                                            | 3                | 14  | 4                | 14  | 3                | 17  | 10  | 45  | 4.50                | 3.79E-04 | 37.5        | (7)(10)(19)(20)                  |  |  |  |  |
| 334           | Q8JZK9 Hydroxymethylglutaryl-CoA synthase, cytoplasmic OS=Mus musculus GN=Hmgcs1 PE=1 SV=1 - [HMCS1_MOUSE]                      | 2                | 6   | 1                | 5   | 1                | 7   | 4   | 18  | 4.50                | 2.19E-03 | 57.5        | (4)(20)                          |  |  |  |  |
| 335           | Q9Z2X1-2 Isoform 2 of Heterogeneous nuclear ribonucleoprotein F OS=Mus musculus GN=Hnrnpf - [HNRPF_MOUSE]                       | 2                | 20  | 9                | 35  | 8                | 30  | 19  | 85  | 4.47                | 1.11E-02 | 43.7        | (16)(19)(20)                     |  |  |  |  |
| 336           | Q3U4W8 Ubiquitin carboxyl-terminal hydrolase OS=Mus musculus GN=Usp5 PE=2 SV=1 - [Q3U4W8_MOUSE]                                 | 1                | 19  | 5                | 19  | 5                | 11  | 11  | 49  | 4.45                | 1.32E-02 | 93.3        | (20)                             |  |  |  |  |
| 337           | P27546-2 Isoform 2 of Microtubule-associated protein 4 OS=Mus musculus GN=Map4 - [MAP4_MOUSE]                                   | 6                | 20  | 6                | 17  | 2                | 25  | 14  | 62  | 4.43                | 3.99E-03 | 117.3       | (1)(7)(12)(13)(16)(19)(20)       |  |  |  |  |
| 338           | Q3U0V1 Far upstream element-binding protein 2 OS=Mus musculus GN=Khsrp PE=1 SV=2 - [FUBP2_MOUSE]                                | 8                | 29  | 9                | 29  | 3                | 27  | 20  | 85  | 4.25                | 3.90E-04 | 76.7        | (10)(16)(19)(20)                 |  |  |  |  |
| 339           | Q6IRU2 Tropomyosin alpha-4 chain OS=Mus musculus GN=Tpm4 PE=2 SV=3 - [TPM4_MOUSE]                                               | 2                | 9   | 2                | 10  | 2                | 6   | 6   | 25  | 4.17                | 6.21E-03 | 28.5        | (7)(16)(19)(20)                  |  |  |  |  |
| 340           | P80314 T-complex protein 1 subunit beta OS=Mus musculus GN=Cct2 PE=1 SV=4 - [TCCP_MOUSE]                                        | 8                | 25  | 6                | 26  | 5                | 28  | 19  | 79  | 4.16                | 8.84E-05 | 57.4        | (4)(19)(20)                      |  |  |  |  |
| 341           | Q00519 Xanthine dehydrogenase/oxidase OS=Mus musculus GN=Xdh PE=1 SV=5 - [XDH_MOUSE]                                            | 5                | 22  | 6                | 21  | 6                | 25  | 17  | 68  | 4.00                | 1.68E-04 | 146.5       | (19)(20)                         |  |  |  |  |
| 342           | P52927 High mobility group protein HMGI-C OS=Mus musculus GN=Hmga2 PE=1 SV=1 - [HMGA2_MOUSE]                                    | 1                | 4   | 1                | 4   | 1                | 4   | 3   | 12  | 4.00                | 0.00E+00 | 11.8        | (19)                             |  |  |  |  |
| 343           | Q6NXL1 Protein Sec24d OS=Mus musculus GN=Sec24d PE=2 SV=1 - [Q6NXL1_MOUSE]                                                      | 1                | 5   | 0                | 3   | 2                | 4   | 3   | 12  | 4.00                | 2.13E-02 | 112.6       | (2)(20)                          |  |  |  |  |
| 344           | P46664 Adenylosuccinate synthetase isozyme 2 OS=Mus musculus GN=Adss PE=1 SV=3 - [PURA2_MOUSE]                                  | 3                | 3   | 1                | 3   | 1                | 2   | 2   | 8   | 4.00                | 1.32E-02 | 50          | (16)(20)                         |  |  |  |  |
| 345           | Q9CPV4 Glyoxalase domain-containing protein 4 OS=Mus musculus GN=Glod4 PE=2 SV=1 - [GLOD4_MOUSE]                                | 3                | 8   | 2                | 7   | 1                | 8   | 6   | 23  | 3.83                | 1.05E-03 | 33.3        | (7)(16)(19)(20)                  |  |  |  |  |
| 346           | P08207 Protein S100-A10 OS=Mus musculus GN=S100a10 PE=2 SV=2 - [S10AA_MOUSE]                                                    | 2                | 6   | 0                | 5   | 2                | 4   | 4   | 15  | 3.75                | 1.42E-02 | 11.2        | (20)                             |  |  |  |  |
| 347           | P63158 High mobility group protein B1 OS=Mus musculus GN=Hmgb1 PE=1 SV=2 - [HMGB1_MOUSE]                                        | 3                | 9   | 2                | 9   | 2                | 8   | 7   | 26  | 3.71                | 1.78E-04 | 24.9        | (7)(12)(16)(19)                  |  |  |  |  |
| 348           | O09106 Histone deacetylase 1 OS=Mus musculus GN=Hdac1 PE=1 SV=1 - [HDAC1_MOUSE]                                                 | 2                | 9   | 2                | 7   | 3                | 10  | 7   | 26  | 3.71                | 2.56E-03 | 55          | (7)(12)(20)                      |  |  |  |  |
| 349           | Q9Z0N1 Eukaryotic translation initiation factor 2 subunit 3, X-linked OS=Mus musculus GN=EIF2s3x PE=1 SV=2 - [IF2G_MOUSE]       | 1                | 3   | 0                | 4   | 2                | 4   | 3   | 11  | 3.67                | 1.61E-02 | 51          | (10)(16)(19)                     |  |  |  |  |
| 350           | Q921F4 Heterogeneous nuclear ribonucleoprotein L-like OS=Mus musculus GN=Hnrpll PE=1 SV=3 - [HNRLL_MOUSE]                       | 2                | 7   | 3                | 11  | 3                | 11  | 8   | 29  | 3.63                | 7.02E-03 | 64.1        | (20)                             |  |  |  |  |

| Accession No. | Description                                                                                                      | 2AzGlcNAc       |    |              |    |              |    |     |    | Enrichment Ratio | T-Test   | MW [kDa] | Previously Identified  |
|---------------|------------------------------------------------------------------------------------------------------------------|-----------------|----|--------------|----|--------------|----|-----|----|------------------|----------|----------|------------------------|
|               |                                                                                                                  | Spectral Counts |    |              |    |              |    |     |    |                  |          |          |                        |
|               |                                                                                                                  | Experiment 1    |    | Experiment 2 |    | Experiment 3 |    | Sum |    |                  |          |          |                        |
| -             | +                                                                                                                | -               | +  | -            | +  | -            | +  | -   | +  |                  |          |          |                        |
| 351           | Q8K310 Matrin-3 OS=Mus musculus GN=Matr3 PE=1 SV=1 - [MATR3_MOUSE]                                               | 3               | 8  | 3            | 10 | 2            | 9  | 8   | 27 | 3.38             | 6.85E-04 | 94.6     | (7)(16)(19)(20)        |
| 352           | H7BWX9 Small ubiquitin-related modifier 2 OS=Mus musculus GN=Sumo2 PE=4 SV=1 - [H7BWX9_MOUSE]                    | 1               | 4  | 1            | 4  | 1            | 2  | 3   | 10 | 3.33             | 2.49E-02 | 6        | (20)                   |
| 353           | Q9D0E1 Heterogeneous nuclear ribonucleoprotein M OS=Mus musculus GN=Hnrnpm PE=1 SV=3 - [HNRPM_MOUSE]             | 3               | 18 | 6            | 18 | 8            | 20 | 17  | 56 | 3.29             | 1.24E-03 | 77.6     | (16)(20)               |
| 354           | A2AKV2 ATP synthase subunit gamma, mitochondrial (Fragment) OS=Mus musculus GN=Atp5c1 PE=4 SV=1 - [A2AKV2_MOUSE] | 1               | 4  | 1            | 4  | 2            | 5  | 4   | 13 | 3.25             | 3.13E-03 | 18.7     |                        |
| 355           | Q8BFW7 Lipoma-preferred partner homolog OS=Mus musculus GN=Lpp PE=1 SV=1 - [LPP_MOUSE]                           | 4               | 14 | 4            | 10 | 3            | 11 | 11  | 35 | 3.18             | 3.04E-03 | 65.8     | (7)(13)(16)(19)(20)    |
| 356           | P24547 Inosine-5'-monophosphate dehydrogenase 2 OS=Mus musculus GN=Impdh2 PE=1 SV=2 - [IMDH2_MOUSE]              | 2               | 9  | 4            | 6  | 2            | 10 | 8   | 25 | 3.13             | 1.46E-02 | 55.8     | (10)(12)(16)(19)       |
| 357           | P17751 Triosephosphate isomerase OS=Mus musculus GN=Tpi1 PE=1 SV=4 - [TPIS_MOUSE]                                | 4               | 15 | 5            | 13 | 4            | 11 | 13  | 39 | 3.00             | 1.96E-03 | 32.2     | (3)(4)(12)(16)(19)(20) |
| 358           | Q60854 Serpin B6 OS=Mus musculus GN=Serpinb6 PE=2 SV=1 - [SPB6_MOUSE]                                            | 5               | 16 | 4            | 9  | 3            | 11 | 12  | 36 | 3.00             | 2.08E-02 | 42.6     | (19)(20)               |
| 359           | P70698 CTP synthase 1 OS=Mus musculus GN=Ctps1 PE=1 SV=2 - [PYRG1_MOUSE]                                         | 3               | 8  | 4            | 8  | 2            | 11 | 9   | 27 | 3.00             | 6.53E-03 | 66.6     | (16)(19)(20)           |
| 360           | P70288 Histone deacetylase 2 OS=Mus musculus GN=Hdac2 PE=1 SV=1 - [HDAC2_MOUSE]                                  | 2               | 4  | 1            | 3  | 1            | 5  | 4   | 12 | 3.00             | 1.61E-02 | 55.3     | (7)(20)                |
| 361           | E9QP59 Inner nuclear membrane protein Man1 OS=Mus musculus GN=Lemd3 PE=4 SV=1 - [E9QP59_MOUSE]                   | 0               | 2  | 1            | 2  | 1            | 2  | 2   | 6  | 3.00             | 1.61E-02 | 100.1    | (20)                   |

## References:

- Alfaro, J. F. et al. Tandem mass spectrometry identifies many mouse brain O-GlcNAcylated proteins including EGF domain-specific O-GlcNAc transferase targets. *Proc Natl Acad Sci USA* 109, 7280–7285 (2012).
- Boyce, M. et al. Metabolic cross-talk allows labeling of O-linked (beta)-N-acetylglucosamine-modified proteins via the N-acetylgalactosamine salvage pathway. *Proc Natl Acad Sci USA* 108, 3141–3146 (2011).
- Cieniewski-Bernard, C. Identification of O-linked N-Acetylglucosamine Proteins in Rat Skeletal Muscle Using Two-dimensional Gel Electrophoresis and Mass Spectrometry. *Mol Cell Proteomics* 3, 577–585 (2004).
- Clark, P. M. et al. Direct In-Gel Fluorescence Detection and Cellular Imaging of O-GlcNAc-Modified Proteins. *J Am Chem Soc* 130, 11576–11577 (2008).
- Dehennaut, V. et al. Identification of structural and functional O-linked N-acetylglucosamine-bearing proteins in *Xenopus laevis* oocyte. *Mol Cell Proteomics* 7, 2229–2245 (2008).
- Gurcel, C. et al. Identification of new O-GlcNAc modified proteins using a click-chemistry-based tagging. *Anal Bioanal Chem* 390, 2089–2097 (2008).
- Hahne, H. et al. Proteome Wide Purification and Identification of O-GlcNAc-Modified Proteins Using Click Chemistry and Mass Spectrometry. *J Proteome Res* 12, 927–936 (2013).
- Khidekel, N. et al. Probing the dynamics of O-GlcNAc glycosylation in the brain using quantitative proteomics. *Nat Chem Biol* 3, 339–348 (2007).
- Khidekel, N., Ficarro, S., Peters, E. & Hsieh-Wilson, L. Exploring the O-GlcNAc proteome: direct identification of O-GlcNAc-modified proteins from the brain. *Proc Natl Acad Sci USA* 101, 13132–13137 (2004).
- Nandi, A. et al. Global identification of O-GlcNAc-modified proteins. *Anal Chem* 78, 452–458 (2006).
- Sprung, R. et al. Tagging-via-substrate strategy for probing O-GlcNAc modified proteins. *J Proteome Res* 4, 950–957 (2005).
- Teo, C. F. et al. Glycopeptide-specific monoclonal antibodies suggest new roles for O-GlcNAc. *Nat Chem Biol* 6, 338–343 (2010).
- Trinidad, J. C. et al. Global identification and characterization of both O-GlcNAcylation and phosphorylation at the murine synapse. *Mol Cell Proteomics* 11, 215–229 (2012).
- Vosseller, K. et al. O-linked N-acetylglucosamine proteomics of postsynaptic density preparations using lectin weak affinity chromatography and mass spectrometry. *Mol Cell Proteomics* 5, 923–934 (2006).
- Wang, Z. et al. Enrichment and Site Mapping of O-Linked N-Acetylglucosamine by a Combination of Chemical/Enzymatic Tagging, Photochemical Cleavage, and Electron Transfer Dissociation Mass Spectrometry. *Mol Cell Proteomics* 9, 153–160 (2010).
- Wang, Z. et al. Extensive Crosstalk Between O-GlcNAcylation and Phosphorylation Regulates Cytokinesis. *Science Signaling* 3, ra2 (2010).
- Wang, Z., Pandey, A. & Hart, G. W. Dynamic Interplay between O-Linked N-Acetylglucosaminylation and Glycogen Synthase Kinase-3-dependent Phosphorylation. *Mol Cell Proteomics* 6, 1365–1379 (2007).
- Wells, L. et al. Mapping sites of O-GlcNAc modification using affinity tags for serine and threonine post-translational modifications. *Mol Cell Proteomics* 1, 791–804 (2002).
- Zaro, B. W., Yang, Y.-Y., Hang, H. C. & Pratt, M. R. Chemical reporters for fluorescent detection and identification of O-GlcNAc-modified proteins reveal glycosylation of the ubiquitin ligase NEDD4-1. *Proc Natl Acad Sci USA* 108, 8146–8151 (2011).
- Chuh, K. N., Zaro, B. W. & Pratt, M. R. Changes in Metabolic Chemical Reporter Structure Yield a Selective Probe of O-GlcNAc Modifications. *J Am Chem Soc* 136, 12283–12295 (2014).
